1 **Title:**

2 *Chromatin profiling of the repetitive and non-repetitive genome of the human fungal*  
3 *pathogen Candida albicans*

4 **Authors:**

5 Robert Jordan Price<sup>1</sup>, Esther Weindling<sup>2</sup>, Judith Berman<sup>2</sup> and Alessia Buscaino<sup>1\*</sup>

6  
7  
8 *Running Title: Candida albicans* chromatin profiling

9  
10 <sup>1</sup> University of Kent, School of Biosciences, Kent Fungal Group, Canterbury Kent,  
11 CT2 7NJ. UK

12 <sup>2</sup> Department of Microbiology and Biotechnology, George S. Wise Faculty of Life  
13 Sciences, Tel Aviv University, Ramat Aviv, 69978, Israel

14 \* To whom correspondence should be addressed. Tel: (+44) (0)1227824854; Email:

15 [A.Buscaino@kent.ac.uk](mailto:A.Buscaino@kent.ac.uk)

16

17 **ABSTRACT**

18 *Background*

19 Eukaryotic genomes are packaged into chromatin structures with pivotal roles in  
20 regulating all DNA-associated processes. Post-translational modifications of histone  
21 proteins modulate chromatin structure leading to rapid, reversible regulation of gene  
22 expression and genome stability which are key steps in environmental adaptation.  
23 *Candida albicans* is the leading fungal pathogen in humans, and can rapidly adapt  
24 and thrive in diverse host niches. The contribution of chromatin to *C. albicans* biology  
25 is largely unexplored.

26 *Results*

27 Here, we harnessed genome-wide sequencing approaches to generate the first  
28 comprehensive chromatin profiling of histone modifications (H3K4me<sup>3</sup>, H3K9Ac,  
29 H4K16Ac and  $\gamma$ -H2A) across the *C. albicans* genome and relate it to gene  
30 expression. We demonstrate that gene-rich non-repetitive regions are packaged in  
31 canonical euchromatin associated with histone modifications that mirror their  
32 transcriptional activity. In contrast, repetitive regions are assembled into distinct  
33 chromatin states: subtelomeric regions and the rDNA locus are assembled into  
34 canonical heterochromatin, while Major Repeat Sequences and transposons are  
35 packaged in chromatin bearing features of euchromatin and heterochromatin.  
36 Genome-wide mapping of  $\gamma$ H2A, a marker of genome instability, allowed the  
37 identification of potential recombination-prone genomic sites. Finally, we present the  
38 first quantitative chromatin profiling in *C. albicans* to delineate the role of the  
39 chromatin modifiers Sir2 and Set1 in controlling chromatin structure and gene  
40 expression.

41 *Conclusions*

42 This study presents the first genome-wide chromatin profiling of histone  
43 modifications associated with the *C. albicans* genome. These epigenomic maps  
44 provide an invaluable resource to understand the contribution of chromatin to *C.*  
45 *albicans* biology.

46 **KEYWORDS:** *Candida albicans*, Chromatin, Histone modifications, Human fungal  
47 pathogen, Heterochromatin, Euchromatin, Epigenetics, Genome Instability, Sir2,  
48 Set1

## 49 **BACKGROUND**

50 Packaging of genomes into chromatin is the key determinant of nuclear organization  
51 [1,2]. The basic unit of chromatin is the nucleosome, consisting of a histone octamer  
52 of two molecules each of histone H2A, H2B, H3, and H4, around which 147 bp of  
53 DNA are wrapped in almost two turns [3]. Histone proteins are subjected to a wide  
54 variety of post-translational modifications, known as histone marks, that decorate  
55 distinct chromatin regions [3]. Modification of chromatin structure controls a plethora  
56 of nuclear processes including gene expression, DNA repair and DNA replication  
57 [3,4]. Consequently, genome-wide maps of histone modifications have been  
58 instrumental in identifying functionally different regions of eukaryotic genomes [5,6].  
59 Gene-rich, non-repetitive DNA is associated with active histone marks, forming  
60 euchromatin, a chromatin state permissive to transcription and recombination [7]. At  
61 euchromatic regions, promoters of active genes are enriched in histone H3  
62 trimethylated on lysine 4 (H3K4me<sup>3</sup>) and acetylated on lysine 9 (H3K9Ac), while  
63 gene bodies are enriched in a different set of histone modifications, such as  
64 acetylation of lysine 16 on histone H4 (H4K16Ac) [8–10]. In contrast, genomic  
65 regions enriched in repetitive DNA and low in gene density are assembled into

66 heterochromatin [7]. These repetitive sequences (including tandem repeats,  
67 transposable elements and gene families) are a threat to genome stability. At  
68 repetitive elements, heterochromatin assembly promotes genome stability by  
69 repressing deleterious recombination events [7,11,12]. Heterochromatin is devoid of  
70 active histone marks (i.e. H3K4me<sup>3</sup>, H3K9Ac and H4K16Ac) and is enriched in  
71 repressive histone marks such as methylation of lysine 9 on histone H3 (H3K9me)  
72 and methylation of lysine 27 on histone H3 (H3K27me) [1].

73 While euchromatin structure is largely conserved across organisms, histone marks  
74 associated with heterochromatic regions vary between organisms. For example, in  
75 the model system *Saccharomyces cerevisiae*, heterochromatin is devoid of H3K9me  
76 and H3K27me marks but nucleosomes are hypomethylated on H3K4 and  
77 hypoacetylated on H3K9 and H4K16 [1,13]. Phosphorylation of serine 129 on  
78 histone H2A (known as  $\gamma$ -H2A) is enriched at heterochromatin regions in *S.*  
79 *cerevisiae*, *Schizosaccharomyces pombe* and *Neurospora crassa*, independently of  
80 the cell cycle stage [14–17]. Given that  $\gamma$ -H2A is a hallmark of DNA double strand  
81 breaks, these findings suggest that heterochromatic regions are flagged for DNA  
82 damage. In contrast, in human cells, phosphorylation of H2AX, a modification  
83 functionally analogous to  $\gamma$ -H2A, does not decorate heterochromatic regions [18,19].

84 Chromatin modifications also play major roles in controlling genome stability by  
85 dictating pathways of DNA repair. Indeed, choices of DNA repair pathways (i.e. Non  
86 Homologous End Joining or Homologous Recombination) depend on the chromatin  
87 state of the genomic region undergoing repair and extensive chromatin changes,  
88 including  $\gamma$ -H2A, are linked to repair of DNA breaks [20]. Consequently, in  
89 unchallenged cells,  $\gamma$ -H2A mapping is used to identify unstable genomic regions  
90 (named  $\gamma$ -sites) that are prone to intrinsic DNA damage and recombination [14].

91 Chromatin modifications are reversible and specific histone modifiers maintain or  
92 erase the histone modification state associated with different chromatin regions.  
93 Among these, histone acetyltransferases (HATs) and histone deacetylases (HDACs)  
94 respectively maintain and erase histone acetylation, while histone  
95 methyltransferases (HMTs) and demethylases (HDMs) are responsible for the  
96 methylation state of histones [2,3]. Chromatin regulation rapidly and reversibly alters  
97 gene expression and genome stability and can, therefore, have a major impact on  
98 environmental adaptation of microbial organisms that need to rapidly adapt to  
99 sudden environmental changes [21,22].

100 One such organism is the human fungal pathogen *Candida albicans*. *C. albicans* is a  
101 commensal organism that colonises the mouth, the skin, and the uro-intestinal and  
102 reproductive tracts of most individuals without causing any harm. However, *C.*  
103 *albicans* is also the most common causative agent of invasive fungal infections and  
104 systemic infections are associated with high mortality rates (up to 50%) [23]. *C.*  
105 *albicans* is such a successful pathogen because it rapidly adapts and thrives in  
106 diverse host niches. The ability to switch among multiple specialised cell types, as  
107 well as its remarkable genome plasticity, is at the basis of *C. albicans* adaptation  
108 [24].

109 *C. albicans* is a diploid organism with a genome organised in 2 x 8 chromosomes  
110 containing 6408 protein-coding genes, in addition to a large number of non-coding  
111 RNAs [25–28]. The genome of *C. albicans* contains several classes of repetitive  
112 elements: telomeres/subtelomeres, the rDNA locus, Major Repeat Sequences (MRS)  
113 and transposable elements [29]. Telomeres are composed of tandemly repeating  
114 230 bp units, while subtelomeres are enriched in long terminal repeats (LTR),  
115 retrotransposons and gene families [29,30].

116 The rDNA locus consists of a tandem array of a ~12 kb unit repeated 50 to 200  
117 times. Each unit contains the two highly conserved 35S and 5S rRNA genes that  
118 are separated by two Non-Transcribed Spacer regions (NTS1 and NTS2), whose  
119 sequences are not conserved with other eukaryotes [29,31].

120 MRS loci are long tracts (10–100 kb) of nested DNA repeats found on 7 of the 8 *C.*  
121 *albicans* chromosomes [29,32]. These repetitive domains, found in *C. albicans* and  
122 in the closely related species *C. dubliensis* and *C. tropicalis*, are formed by large  
123 tandem arrays of 2.1 kb RPS unit flanked by non-repetitive HOK and RBP-2  
124 elements. Each RBP-2 element contains a protein-coding gene, *FGR6*, important for  
125 morphological switches [32,33].

126 Several classes of retrotransposons are present in the *C. albicans* genome including  
127 16 classes of LTR retro-transposons (Tca1-16) and Zorro non-LTR retrotransposons  
128 that are present in 5-10 copies per cell, dispersed along the chromosomes. Among  
129 those, Tca2, Tca4, Tca5, Zorro-2 and Zorro-3 are capable of transposition [34–36].

130 The *C. albicans* genome is remarkably plastic, and natural isolates exhibit a broad  
131 spectrum of genomic variations including Loss of Heterozygosity (LOH) events,  
132 chromosome rearrangements and aneuploidy [37]. Evolution experiments and  
133 analyses of clinical isolates have demonstrated that repetitive elements are  
134 hypermutable sites of the *C. albicans* genome and are prone to high rates of  
135 recombination [37,38].

136 Several studies have demonstrated that regulation of chromatin structure plays  
137 critical roles in regulating *C. albicans* gene expression and genome instability [39–  
138 42]. However, comprehensive profiling of histone modifications across the whole *C.*  
139 *albicans* genome is still lacking. Generation of these epigenomic maps will be

140 essential to truly understand the impact of chromatin regulation to *C. albicans*  
141 adaptation and development of virulence traits.  
142 In this study, we used chromatin immunoprecipitation with massively parallel  
143 sequencing (ChIP-seq) technology to establish the first comprehensive genome-wide  
144 map of *C. albicans* histone modifications (H3K4me<sup>3</sup>, H3K9Ac, H4K16Ac and  $\gamma$ H2A),  
145 marking euchromatic, heterochromatic regions and potential recombination-prone  
146 unstable sites. Genome-wide mapping of RNA Polymerase II (RNAPII) and  
147 transcriptome expression profiling allowed us to unveil the link between histone  
148 modification states and transcriptional activity. We demonstrate that specific  
149 chromatin states are associated with the repetitive and non-repetitive *C. albicans*  
150 genome. While gene-rich regions are associated with active chromatin marks  
151 mirroring their transcriptional state, different types of repetitive elements are  
152 assembled into distinct chromatin types. Finally, we present the first *C. albicans*  
153 quantitative ChIP-seq (q-ChIP-seq) methodology that has permitted us to elucidate  
154 the roles of the HDAC Sir2 and the HMT Set1 in shaping the chromatin state of *C.*  
155 *albicans* genome and regulating gene expression.

## 156 **RESULTS**

### 157 ***Genome-wide histone modification profiling in C. albicans***

158 The *C. albicans* genome contains two homologous pairs of divergently transcribed  
159 histone H2A and H2B genes, and histone H3 and H4 genes in addition to a single  
160 histone H3 gene (Fig S1 A). Sequence alignment demonstrated that the frequently  
161 modified amino acid residues H3K4, H3K9, H4K16 and H2AS129 are conserved in  
162 *C. albicans* (Fig S1 B).

163 To explore the chromatin signature of *C. albicans* repetitive and non-repetitive  
164 regions, we globally mapped the genomic locations of H3K4me<sup>3</sup>, H3K9Ac, H4K16Ac

165 and  $\gamma$ H2A by performing Chromatin ImmunoPrecipitation followed by high-throughput  
166 sequencing (ChIP-seq). Since nucleosomes are not equally distributed across  
167 genomes, we accounted for nucleosome occupancy by performing genome-wide  
168 profiling of unmodified histone H3 and histone H4. Finally, to correlate specific  
169 histone modification profiling with transcriptional activity, we mapped RNA  
170 polymerase II (RNAPII) occupancy genome-wide. In parallel, we performed  
171 transcriptome analysis by strand-specific RNA sequencing (RNA-seq) to profile gene  
172 expression levels.

173 For all samples, ChIP-seq was performed from *C. albicans* wild-type (WT) cells  
174 grown in standard laboratory growth conditions (YPAD 30 °C) using antibodies  
175 specific for modified or unmodified histones. Input (I) and Immunoprecipitated  
176 samples (Ip) were sequenced using the Illumina HiSeq2000 platform (single-end 50  
177 bp reads; average coverage: 28x; Table S2, Dataset S1) and aligned to a custom  
178 haploid version of Assembly 22 of the *C. albicans* genome [25]. Unmodified histone  
179 H3 occupancy showed a strong positive correlation with histone H4 occupancy  
180 (Pearson correlation coefficient  $r = 0.97$ ), with the exception of centromeric regions  
181 where the histone H3 variant Cse4<sup>CENP-A</sup> replaces histone H3 (Fig 1A, 1C and S2).  
182 Furthermore, RNAPII occupancy showed a positive correlation with gene expression  
183 levels (Pearson correlation coefficient  $r = 0.72$ ) (Fig 1B).

#### 184 ***H3K4me<sup>3</sup>, H3K9Ac and H4K16Ac mark C. albicans active genes***

185 To delineate the chromatin signature of protein-coding *C. albicans* genes,  
186 enrichment profiles for each histone modification were compared to histone H4.  
187 Differential enrichment testing using DESeq2 allowed the identification of regions  
188 with statistically significant enrichment or depletion for particular histone marks  
189 compared to histone H4. We annotated these loci by proximity to annotated protein-



190 coding genes and non-coding RNAs [25–27]. For RNAPII, aligned reads from ChIP  
191 (IP) samples were normalised to aligned reads from the matching input (I) sample.  
192 Metagene analyses demonstrate that, as expected, RNAPII is enriched across all  
193 gene bodies while unmodified histone H3 is not significantly enriched or depleted  
194 relative to unmodified histone H4. In contrast, H3K4me<sup>3</sup> and H3K9Ac are more  
195 prominent at the transcriptional start site (TSS) and 5' regions of genes, and  
196 H4K16Ac is enriched at gene bodies. (Fig 2A).  
197 To further explore the relationship between chromatin modifications and gene  
198 transcriptional states, we grouped all genes into four sets based on expression level  
199 (no expression, low expression, medium expression and high expression) as  
200 revealed by RNA-seq analysis (Fig S3). Enrichment profile plots of the levels of  
201 histone modifications for each of these gene sets demonstrated that H3K4me<sup>3</sup>,  
202 H3K9Ac and H4K16Ac levels are very low at genes with low transcription rates.  
203 Levels of all modifications increase with increased gene expression reaching a  
204 maximum at highly transcribed genes (Fig 2B).  
205 Therefore, in *C. albicans*, H3K4me<sup>3</sup>, H3K9Ac and H4K16Ac correlate with gene  
206 transcription; H3K4me<sup>3</sup> and H3K9Ac are more enriched at the 5' of a gene and  
207 H4K16Ac at the gene bodies.

208 ***γ*-H2A is enriched at convergent genes and in proximity of DNA replication**  
209 ***origins***

210 Having established that different regions of the *C. albicans* genome are marked by  
211 different chromatin modifications depending on their transcriptional state (Fig 2), we  
212 sought to systematically map the genome-wide profile of *γ*H2A (*γ*-sites) in cycling  
213 undamaged cells, as this is a useful method to identify recombination-prone unstable  
214 sites [14]. Genome-wide ChIP-seq of *γ*H2A identified 168 *γ*-sites where *γ*H2A is

215 enriched compared to histone H4 (Dataset S1). *C. albicans*  $\gamma$ -sites are different from  
216 the  $\gamma$ H2A -domain caused by irrecoverable DSBs as  $\gamma$ -sites have generally a single  
217 peak of enrichment and they are shorter (average length 850 bp) than the 50-kb  
218 length of the that  $\gamma$ H2A domain surrounding DSBs [44].

219 Analysis of  $\gamma$ -sites indicates that they are present at three classes of genomic loci: (i)  
220 longer genes that are often convergent, (ii) origins of replication and (iii) subtelomeric  
221 regions (discussed below) (Fig 3A and 3B).

222 At convergent genes,  $\gamma$ H2A enrichment is detected at both the gene bodies and  
223 intergenic regions, and no correlation was detected between gene expression levels  
224 and  $\gamma$ H2A occupancy. Although we did not observe any correlation between  $\gamma$ -sites  
225 and histone H3 occupancy (Pearson Correlation  $r = 0.062$ ),  $\gamma$ -sites are more likely to  
226 mark genomic regions that are acetylated on H4K16 and H3K9 (Pearson correlation  
227  $r = 0.461$  and  $0.276$ , respectively). We also detect a weak negative correlation  
228 between  $\gamma$ H2A occupancy and H3K4me<sup>3</sup> (Fig 3C).

### 229 ***The chromatin state of the C. albicans repetitive genome***

230 Having determined the chromatin marks associated with *C. albicans* coding genes,  
231 we analysed the chromatin state of the *C. albicans* repetitive genome focusing on  
232 the major classes of DNA repeats: subtelomeric regions, the rDNA locus, MRS  
233 repeats and transposable elements (LTR and non-LTR retrotransposons). Sequence  
234 analysis of these elements can be problematic because of incomplete sequencing  
235 and their repetitive nature [25,29]. To estimate the chromatin modification state of  
236 these loci, we adopted a method previously applied to *S. cerevisiae* repeats and  
237 assumed that each repeat contributes equally to read-depth [45]. Consequently,  
238 reads that could not be uniquely mapped to one location were randomly assigned to  
239 copies of that repeat.

240 To investigate the chromatin state associated with the 16 subtelomeric regions in *C.*  
241 *albicans*, we analysed the ChIP-seq datasets in the 20-kb terminal regions of each  
242 chromosome arm. At these locations, occupancy of unmodified histone H3 was  
243 similar to histone H4 occupancy (Fig 4A, S4 and S5). In contrast, we detected large  
244 domains of chromatin that are hypomethylated on H3K4 and hypoacetylated on  
245 H3K9 and H4K16 (Fig 4A, S4 and S5). However, the H3K4 methylation and  
246 H3K9/H4K16 acetylation state of subtelomeres is not uniform as patches of high  
247 H3K4me<sup>3</sup>, H3K9Ac and H4K16Ac are detected within each subtelomere (Fig 4A, S4  
248 and S5). We detected statistically significant  $\gamma$ H2A enrichment at 13/16 subtelomeres  
249 (Fig 4A, S4 and S5). We suspect that absence of  $\gamma$ -sites at ChrRR, Chr1R and Chr7L  
250 subtelomeric regions is due to incomplete genome assembly [25,29]. Subtelomeric  
251  $\gamma$ H2A enrichment is not uniform but present at distinct peaks within each  
252 subtelomere, which largely associate with hypoacetylated and hypomethylated  
253 chromatin (Fig 4A, S4 and S5).

254 Analysis of chromatin modifications associated with the rDNA locus demonstrate that  
255 the NTS1 and NTS2 regions are assembled into a chromatin structure resembling  
256 heterochromatin where nucleosomes are hypomethylated on H3K4 and  
257 hypoacetylated on H3K9 and H4K16 (Fig 4B). These findings are consistent with our  
258 published results demonstrating that these regions are assembled into  
259 transcriptionally silent heterochromatin [46]. Intriguingly, we detected two  $\gamma$ -sites at  
260 convergently transcribed genes surrounding the rDNA locus (Fig 4B).

261 This analysis also reveals that MRS repeats and retrotransposons (LTR and non-  
262 LTR) are associated with chromatin that is largely hypomethylated on H3K4 (Fig 4C,  
263 4D). In contrast, H3K9Ac and H4K16Ac are similar to histone H4 levels (Fig 4C, 4D).

264 We did not detect any statistically significant enrichment of  $\gamma$ -H2A at either MRSs or  
265 retrotransposons.

266 Therefore, different *C. albicans* repetitive elements are associated with distinct  
267 chromatin states. Repetitive regions are more likely to be hypomethylated on H3K4,  
268 but are neither hypoacetylated on H3K9 and H4K16 nor enriched for  $\gamma$ -H2A.

269 ***The HDAC Sir2 governs the hypoacetylated state associated with C. albicans***  
270 ***rDNA locus and subtelomeric regions***

271 We have previously shown that, in *C. albicans*, the histone deacetylase Sir2  
272 maintains the low level of H3K9Ac associated with the NTS regions of the rDNA  
273 locus [46]. To assess the role of the HDAC Sir2 in maintaining acetylation levels  
274 across the *C. albicans* genome, we performed H3K9Ac and H4K16Ac ChIP-seq  
275 analyses in WT and *sir2 $\Delta/\Delta$*  strains.

276 Traditional ChIP-seq are not inherently quantitative as it allows comparison of protein  
277 occupancies at different positions within a genome but it does not allow direct  
278 comparisons between samples derived from different strains [47–49]. To overcome  
279 this issue, we adapted *C. albicans* to a quantitative ChIP-seq (q-ChIP-seq)  
280 methodology [47–49]. To this end, WT and *sir2 $\Delta/\Delta$*  were spiked-in, at the time of  
281 fixation, with a single calibration sample from *S. cerevisiae* (Fig 5A). *S. cerevisiae*  
282 genome is a desirable exogenous reference for *C. albicans* cells because its  
283 genome is well studied and has a high-quality sequence assembly [50]. Moreover,  
284 reads originating from *C. albicans* or *S. cerevisiae* can be easily separated at the  
285 analysis level and our experiments reveal less than 2% of the total number of reads  
286 cannot be uniquely mapped (Table S2). Finally, histone proteins are well conserved  
287 between *C. albicans* and *S. cerevisiae* (Fig S1) and therefore the same histone

288 antibody is likely to immunoprecipitate *C. albicans* and *S. cerevisiae* chromatin with  
289 the same efficiency.

290 The q-ChIP-seq analyses identify only two regions of the *C. albicans* genome with  
291 increased H3K9Ac and H4K16Ac levels: subtelomeric regions and the NTS region of  
292 the rDNA locus (Fig 5B, 5C, S6, S7 and Dataset S1). Deletion of *SIR2* does not lead  
293 to increased histone acetylation levels at euchromatic regions or at other repetitive  
294 elements such as MRS and retrotransposons (Dataset S1). In agreement with these  
295 findings, the majority (83%) of gene expression changes observed in *sir2Δ/Δ* cells  
296 occur at the rDNA locus and subtelomeric regions (Fig 5B, 5C, Dataset S1 and [46])  
297 We conclude that the *C. albicans* HDAC Sir2 acts exclusively at two genomic  
298 regions: the rDNA locus and subtelomeric regions. Our findings are consistent with  
299 the hypothesis that Sir2-mediated histone deacetylation represses gene expression  
300 at these locations.

301 ***Set1-dependent methylation of H3K4 impacts gene expression differentially at***  
302 ***different repeats***

303 Our data demonstrates that *C. albicans* repetitive elements are associated with  
304 chromatin that is hypomethylated on H3K4. However, at these regions, H3K4  
305 methylation is not completely ablated as pockets of H3K4me<sup>3</sup> are detected (Fig 4). In  
306 *S. cerevisiae* and *S. pombe*, the H3K4 methyltransferase Set1 has been implicated  
307 in both gene repression and activation [51–56]. *S. cerevisiae* Set1 also maintains the  
308 transcriptional silencing associated with heterochromatic regions such as the  
309 telomeres and the rDNA locus [51–56]. *C. albicans* Set1 is important for efficient  
310 yeast-to-hyphae switching but its function in regulating chromatin structure and gene  
311 expression is unknown [57].

312 To gain insights into the role of *C. albicans* Set1, we performed H3K4me<sup>3</sup> q-ChIP-  
313 seq and RNA-seq analyses of WT and *set1Δ/Δ* strains. *C. albicans* Set1 clearly plays  
314 a major role in maintaining chromatin structure as 6846 loci, scattered throughout the  
315 genome, have a statistically significant reduction of H3K4me<sup>3</sup> in *set1Δ/Δ* compared  
316 to WT strain (Fig 6A and Dataset S1). RNA-seq analysis reveals that Set1 regulates  
317 gene expression both positively and negatively, as genes with a reduced H3K4me<sup>3</sup>  
318 pattern can be either upregulated (2320 genes/ ncRNAs) or downregulated (3184  
319 genes/ ncRNAs) in *set1Δ/Δ* compared to WT (Fig 6A and Dataset S1). Analyses of  
320 the H3K4me<sup>3</sup> pattern and gene expression levels associated with repetitive elements  
321 demonstrates that Set1 has distinct roles at different repeats. At subtelomeric  
322 regions and the rDNA locus, deletion of the *SET1* gene leads to the reduced  
323 H3K4me<sup>3</sup> levels and is accompanied by the down-regulation of associated genes  
324 (Fig 6B, 6C and S8). In contrast, the reduced H3K4me<sup>3</sup> pattern associated with MRS  
325 repeats in the *set1Δ/Δ* strain leads to increased expression of coding and non-coding  
326 RNAs originating from MRS repeats (Fig 6D). Finally, deletion of *SET1* leads to  
327 decreased H3K4me<sup>3</sup> at retrotransposons without a significant impact on expression  
328 of retrotransposon-associated coding and non-coding RNAs.

329 We conclude that Set1 is the major H3K4-methyltransferase *in C. albicans* playing a  
330 key role in controlling chromatin structure and gene expression. Importantly, our  
331 analysis reveals that although deletion of *SET1* results in decreased H3K4  
332 methylation across all repetitive elements, Set1 influences gene expression  
333 differentially at each repetitive element.

## 334 **DISCUSSION**

335 Here, we present the first comprehensive chromatin profiling of histone modifications  
336 associated with the *C. albicans* genome. Furthermore, we present the first *C.*

337 *albicans* quantitative ChIP-seq to delineate the role of the chromatin modifiers Sir2  
338 and Set1 in *C. albicans*.

339 ***The chromatin state of the C. albicans repetitive and non-repetitive genome***

340 In all organisms, gene-rich genomic regions are associated with a histone  
341 modification pattern mirroring their transcriptional state where H3K4me<sup>3</sup> and H3K9Ac  
342 are enriched at active gene promoters and H4K16Ac is localised at gene bodies of  
343 expressed genes [9,10]. Our first objective was to obtain “proof of concept”  
344 epigenomic maps of chromatin modifications associated with gene rich regions of the  
345 *C. albicans* genome. A robust histone modification profiling relies on (i) the use of  
346 antibodies that recognise modified histones with high specificity and (ii) the use of  
347 appropriate biological controls. Specificity of antibodies used in this study has been  
348 tested in *S. pombe* or *S. cerevisiae* histone mutants lacking the modifiable amino  
349 acid (H3K9, H4K16, H2AS129) [14,58]. To distinguish between nucleosome  
350 occupancy and depletion/enrichment of specific histone modifications ChIP seq  
351 analyses was also performed using antibodies recognising unmodified histone H3  
352 and H4. This is an important control that should be included in all studies aimed to  
353 analyse chromatin modification genome wide.

354 Our results confirm the validity of our experimental approach and conform to the  
355 chromatin pattern reported in other organisms by showing that active genes,  
356 associated with high levels of RNA Pol II, are assembled into canonical euchromatin  
357 where H3K4me<sup>3</sup> and H3K9Ac are associated with promoters and H4K16Ac is  
358 enriched at gene bodies. We conclude that in *C. albicans*, as in other organisms, a  
359 specific histone modification pattern is predictive of active transcription.

360 Analyses of the chromatin profiling of repetitive elements demonstrate that repetitive  
361 regions associated with the NTS regions of the rDNA locus and subtelomeric regions

362 are packaged into chromatin resembling the heterochromatic structure of other  
363 organisms, like the budding yeast *S. cerevisiae*, lacking H3K9me/H3K27me systems  
364 [45]. These findings are in agreement with our previous study demonstrating that the  
365 rDNA locus and subtelomeric regions are able to silence embedded marker genes,  
366 which is a hallmark of heterochromatic regions [46]. In contrast, we find that *C.*  
367 *albicans* retrotransposons and MRS repeats are assembled into a distinct chromatin  
368 state where nucleosomes are hypomethylated on H3K4me<sup>3</sup>, but also acetylated on  
369 H3K9 and H4K16. Analyses of clinical isolates and *in vivo* evolution experiments  
370 have demonstrated that, in the host, MRSs and transposons are recombination  
371 hotspots as they are known sites of translocations [32,38,59]. Given the key roles of  
372 chromatin in regulating genome stability, it will be important to investigate whether  
373 the chromatin packaging of MRS and transposons regulates genome stability.

374 ***γH2A decorates C. albicans heterochromatic regions and potential***  
375 ***recombination-prone unstable sites***

376 The genome-wide  $\gamma$ -H2A profiling performed in this study reveals that this histone  
377 modification, a hallmark of DNA damage, is enriched at heterochromatic regions  
378 assembled into hypoacetylated chromatin that is also hypomethylated on H3K4. This  
379 is similar to observations in other fungal organisms where  $\gamma$ -H2A decorates  
380 heterochromatic regions [14–17]. In contrast, we did not detect any significant  
381 enrichment of  $\gamma$ -H2A at other repetitive elements such as MRS repeats and  
382 transposable elements. This is surprising because, in the host, MRS repeats are  
383 recombination hot-spots [32,38] and therefore a place where DSBs might be  
384 expected to accumulate. *C. albicans* genome instability is increased under host-  
385 relevant stresses [60,61] and therefore we propose that the recombination potential  
386 of MRSs is unlocked following exposure the specific host niche stresses.



387 Finally, we detected 168 additional  $\gamma$ -sites located in proximity of origins of replication  
388 or convergent genes that are often long. DNA replication origins are known  
389 replication fork barriers in many organisms and read-through transcription of  
390 convergent genes can also cause genome instability by, for example, R-loop  
391 formation [62]. Therefore, we propose that the  $\gamma$ -sites identified in this study  
392 represent novel recombination-prone unstable sites of the *C. albicans* genome.

393 ***The role of the histone deacetylase Sir2 and the histone methyltransferase***  
394 ***Set1 in controlling the C. albicans epigenome***

395 We present the first quantitative ChIP-seq in *C. albicans* that has allowed us to  
396 delineate the roles of the histone modifying enzymes Sir2 and Set1. We demonstrate  
397 that Sir2 maintains the hypoacetylated state of heterochromatic regions associated  
398 with the rDNA locus and subtelomeric regions. Sir2 deacetylation at these loci is  
399 linked to gene repression as shown by RNA-seq analysis. In contrast, we find that  
400 deletion of Sir2 does not lead to increased histone acetylation and gene expression  
401 at other genomic regions. Two possible scenarios could explain these findings: (i)  
402 Sir2 is specifically targeted to subtelomeres and the rDNA locus or (ii) other histone  
403 deacetylases act redundantly to Sir2 regulating hypoacetylation and gene expression  
404 at other genomic locations.

405 We present evidence demonstrating that the HMT Set1 is a major contributor to  
406 chromatin structure in *C. albicans*. Indeed, deletion of *SET1* leads to an almost  
407 complete ablation of H3K4 methylation and is linked to extensive gene expression  
408 changes. This demonstrates that *C. albicans* Set1 is the major H3K4  
409 methyltransferase. It is particularly intriguing that deletion of *SET1* leads to  
410 decreased H3K4me<sup>3</sup> at all known repeats, yet its effect on gene expression can be

411 the opposite. Indeed, we demonstrate that at the rDNA locus and subtelomeric  
412 regions Set1 represses gene expression while it activates gene expression at MRS  
413 repeats. Further studies will untangle the role of Set1 at different genomic regions.

## 414 **CONCLUSIONS**

415 In this study we present the first epigenomic map of histone modifications associated  
416 with the *C. albicans* genome. Given the key role of chromatin in regulating *C.*  
417 *albicans* biology, the data generated in this study provide an invaluable resource to a  
418 better understanding of this important human fungal pathogen.

## 419 **METHODS**

### 420 ***Yeast growth and manipulation***

421 Strains used in this study are listed in the Table S1. Yeast cells were cultured in  
422 YPAD broth containing 1% yeast extract, 2% peptone, 2% dextrose, 0.1 mg/ml  
423 adenine and 0.08 mg/ml uridine at 30°C.

### 424 ***Antibody Information***

425 The following antibodies were used in this study: anti-H2AS129p (Millipore; Cat No:  
426 07-745-I), anti-H3 (Abcam; Cat No: ab1791), anti-H4 (Millipore; Cat No: 05-858),  
427 anti-H3K4me3 (Active Motif; Cat No: 39159), anti-H3K9ac (Active Motif; Cat No:  
428 39137), anti-H4K16ac (Active Motif; Cat No: 39167), and anti-RNA Polymerase II  
429 (BioLegend; Cat No: 664903).

### 430 ***ChIP-seq***

431 Chromatin immunoprecipitation with deep-sequencing (ChIP-seq) was performed as  
432 follows: 5 ml of an overnight culture grown in YPAD was diluted into fresh YPAD and  
433 grown until the exponential phase ( $OD_{600} = 0.6-0.8$ ). 20  $OD_{600}$  units of cells were  
434 fixed with 1% formaldehyde (Sigma) for 15 minutes at room temperature. Reactions

435 were quenched by the addition of glycine to a final concentration of 125 mM. Cells  
436 were lysed using acid-washed glass beads (Sigma) and a DisruptorGenie (Scientific  
437 Industries) for four cycles of 30 minutes at 4°C with 5 minutes on ice between cycles.  
438 Chromatin was sheared to 200–500 bp using a BioRuptor sonicator (Diagenode) for  
439 a total of 20 minutes (30 seconds on, 30 seconds off cycle) at 4°C.  
440 Immunoprecipitation was performed overnight at 4°C using 2 µl of the appropriate  
441 antibody and 25 µl of protein G magnetic Dynabeads (Invitrogen). ChIP DNA was  
442 eluted, and cross-links reversed at 65°C in the presence of 1% SDS. All samples  
443 were then treated with RNaseA and proteinase K before being purified by  
444 phenol:chloroform extraction and ethanol precipitation. Libraries were prepared and  
445 sequenced as 50bp single end reads on an Illumina Hi seq2000 platform by the  
446 Genomics Core Facility at EMBL (Heidelberg, Germany). All ChIP-seq experiments  
447 were carried out in biological duplicates.

#### 448 **q-ChIP-seq**

449 Quantitative chromatin immunoprecipitation with deep-sequencing (q-ChIP-seq) was  
450 performed similarly to the ChIP-seq method, except: 5 ml of an overnight culture of  
451 the *S. cerevisiae* reference strain BY4741 was grown alongside *C. albicans* in YPAD.  
452 These cultures were then diluted into fresh YPAD and grown until the exponential  
453 phase ( $OD_{600} = 0.6-0.8$ ). 20  $OD_{600}$  units of *C. albicans* cells were combined with 10  
454  $OD_{600}$  units of *S. cerevisiae* cells, and then fixed with 1% formaldehyde (Sigma) for  
455 15 minutes at room temperature. After the cells had been fixed, the q-ChIP-seq  
456 sample was processed as a single ChIP-seq sample throughout the experiment until  
457 completion of DNA sequencing. All q-ChIP-seq experiments were carried out in  
458 biological duplicates.

459 ***RNA-seq***

460 RNA was extracted from exponential cultures ( $OD_{600} = 0.6-0.8$ ) using a yeast RNA  
461 extraction kit (E.Z.N.A. Isolation Kit RNA Yeast; Omega Bio-Tek) following the  
462 manufacturer's instructions. RNA quality was checked by electrophoresis under  
463 denaturing conditions in 1% agarose, 1x HEPES, 6% formaldehyde (Sigma). RNA  
464 concentration was measured using a NanoDrop ND-1000 spectrophotometer.  
465 Strand-specific cDNA Illumina barcoded libraries were generated from 1  $\mu$ g of total  
466 RNA and sequenced as 50bp single end reads using an Illumina Hi seq2000  
467 sequencer by the Genomics Core Facility at EMBL (Heidelberg, Germany). All RNA-  
468 seq experiments were carried out in biological duplicates.

469 ***Analysis of high-throughput sequencing***

470 All datasets generated and analysed during the current study are available in the  
471 BioProject NCBI repository (<https://www.ncbi.nlm.nih.gov/bioproject>) under the  
472 BioProject ID (PRJNA503946).

473 ***ChIP-seq Analysis:***

474 Illumina reads were mapped using Bowtie2 [63] to a custom haploid version of  
475 assembly 22 of the *C. albicans* genome (Table S2). Reads that mapped to repeated  
476 sequences were randomly assigned to copies of that repeat, allowing for an  
477 estimation of enrichment at the repetitive elements of the genome. Peak calling was  
478 performed using MACS2 [64] on the default settings, except that no model was used  
479 with all reads extended to 250 bp. MACS2 was run separately on both biological  
480 replicates for each ChIP-seq sample. For each sample analysed with MACS2, the IP  
481 sample was the "treatment," and the input sample was the "control." We defined  
482 peaks as reproducible if they were called in both data sets. Read counts within peak  
483 intervals were generated using featureCounts [65]. For each interval, biological

484 duplicate counts were compared between each histone modification and unmodified  
485 histone H4 samples using DESeq2, with an adjusted p-value threshold of <0.05  
486 being used to identify significant differences. Replicates were compared by  
487 generating a raw alignment coverage track and performing a Pearson correlation  
488 between them using the multiBamSummary and plotCorrelation tools as part of the  
489 deepTools2 package (Fig S9) [66]. Genome coverage tracks were made using the  
490 pileup function of MACS2 [64] and tracks from biological replicates were averaged  
491 after the replicates were deemed to be sufficiently correlative ( $r > 0.9$ ). For each  
492 coverage track, reads per million (RPM) were calculated. The histone modification  
493 coverage tracks were normalised to unmodified histone H4, and the RNAPII track  
494 was normalised to the respective input sample. All coverage tracks were visualised  
495 using IGV [67]. Metaplots and heatmaps were made using computeMatrix, plotProfile  
496 and plotHeatmap tools as part of the deepTools2 package [66].

497 *q-ChIP-seq Analysis:*

498 To isolate the reads that uniquely aligned to the *C. albicans* genome, the full datasets  
499 were first aligned to the *S. cerevisiae* genome (sacCer3). The unaligned reads were  
500 output as separate fastq files, and then these reads were aligned to a custom  
501 haploid version of assembly 22 of the *C. albicans* genome (Table S2). The same  
502 strategy was used to isolate reads that uniquely aligned to *S. cerevisiae* (Table S2).  
503 All alignments were performed using Bowtie2 [63]. The unique *S. cerevisiae* reads  
504 were then used to calculate the normalisation factor (normalisation factor =  $1 /$   
505 [unique reference reads/1,000,000]), according to Orlando et al. [48]. Reads that  
506 mapped to repeated sequences in the *C. albicans* genome were randomly assigned  
507 to copies of that repeat. Peak calling was performed using MACS2 [64] on the  
508 default settings, except that no model was used with all reads extended to 250bp.

509 MACS2 was run separately on both biological replicates for each ChIP-seq sample.  
510 For each sample analysed with MACS2, the IP sample was the “treatment,” and the  
511 input sample was the “control.” Peaks called in both replicate datasets for mutant  
512 and WT samples were combined into one peak set for each histone modification.  
513 Read counts within these peak intervals were generated using featureCounts (Liao  
514 et al. 2014), which were then scaled by the normalisation factor to obtain the  
515 reference reads per million (RRPM). For each interval, RRPM values were compared  
516 between the mutant and WT samples using a two-sample t-test, with a p-value  
517 threshold of <0.05 being used to identify significant differences. Replicates were  
518 compared by generating a raw alignment coverage track and performing a Pearson  
519 correlation between them using the multiBamSummary and plotCorrelation tools as  
520 part of the deepTools2 package (Fig S9) [66]. Genome coverage tracks were made  
521 using the pileup function of MACS2 [64] and for each track, RRPM values were  
522 calculated using the normalisation factor. Coverage tracks from biological replicates  
523 were averaged after the replicates were deemed to be sufficiently correlative ( $r >$   
524 0.9), and the mutant strain coverage tracks were normalised to the WT coverage. All  
525 tracks were visualised using IGV [67]. Metaplots and heatmaps were made using  
526 computeMatrix, plotProfile and plotHeatmap tools as part of the deepTools2 package  
527 [66].

#### 528 *RNA-seq Analysis:*

529 Reads were aligned to a custom haploid version of assembly 22 of the *C. albicans*  
530 genome using HISAT2 (Table SX) [68], and per-gene transcript quantification was  
531 performed using featureCounts, which discards multi-mapped read fragments;  
532 therefore, only uniquely mapped reads were included for the expression analysis  
533 [65]. Differential expression testing was performed using DESeq2, with an adjusted

534 p-value threshold of <0.05 being used to determine statistical significance.  
535 Replicates were compared by generating a raw alignment coverage track and  
536 performing a Pearson correlation between them using the multiBamSummary and  
537 plotCorrelation tools as part of the deepTools2 package (Fig S10) [66]. Scatterplots  
538 and correlation analyses were performed in R using Pearson correlation.

539

## 540 **DECLARATION**

541 *Ethics approval and consent to participate:* 'Not applicable'; *Consent for publication:*

542 'Not applicable'; *Availability of data and material:* The datasets generated and

543 analysed during the current study are available in the BioProject NCBI repository

544 (<https://www.ncbi.nlm.nih.gov/bioproject>) under the BioProject ID (PRJNA503946).;

545 *Competing interests:* 'Not applicable'; *Funding:* This work was supported by MRC

546 (MR/M019713/1 to A.B., R.J.P.) and an ERC Grant (340087, RAPLODAPT to J.B.)

547 *Authors' contributions* R.J.P conducted the CHIP seq , the RNA-seq and the

548 bioinformatics analyses. E.W performed RNAseq experiments of *sir2*  $\Delta/\Delta$  strain. A.B

549 and J.B conceived the project, designed the experiments and wrote the manuscript.

550 *Acknowledgements:* We thank members of the Kent Fungal Group, Jan Soetaert and

551 Alison Pidoux for discussion and critical reading of the manuscript. We thank the

552 Gene Core Facility at EMBL (Heidelberg-Germany) for Illumina Sequencing.

## 553 **REFERENCES**

554 1. Allshire RC, Madhani HD. Ten principles of heterochromatin formation and

555 function. Nat. Rev.;19:229–44.

556 2. Strahl BD, Allis CD. The language of covalent histone modifications. Nature.

557 2000;403:41–5.

558 3. Allis CD, Jenuwein T. The molecular hallmarks of epigenetic control. Nat. Rev.

- 559 Genet. 2016;17:487–500.
- 560 4. Van HT, Santos MA. Histone Modifications and the DNA Double-Strand Break  
561 Response. *Cell Cycle* Taylor & Francis; 2018;0:15384101.2018.1542899.
- 562 5. Ernst J, Kheradpour P, Mikkelsen TS, Shores N, Ward LD, Epstein CB, et al.  
563 Mapping and analysis of chromatin state dynamics in nine human cell types. *Nature*.  
564 2011;473:43–9.
- 565 6. Guttman M, Amit I, Garber M, French C, Lin MF, Feldser D, et al. Chromatin  
566 signature reveals over a thousand highly conserved large non-coding RNAs in  
567 mammals. *Nature* 2009;458:223–7.
- 568 7. Janssen A, Colmenares SU, Karpen GH. Heterochromatin: Guardian of the  
569 Genome. *Annu. Rev. Cell Dev. Biol.* 2018;34:annurev-cellbio-100617-062653.
- 570 8. Howe FS, Fischl H, Murray SC, Mellor J. Is H3K4me3 instructive for transcription  
571 activation? *BioEssays*. 2017;39:1–12.
- 572 9. Wang Z, Zang C, Rosenfeld JA, Schones DE, Barski A, Cuddapah S, et al.  
573 Combinatorial patterns of histone acetylations and methylations in the human  
574 genome. *Nat. Genet.* 2008;40:897–903.
- 575 10. Heintzman ND, Stuart RK, Hon G, Fu Y, Ching CW, Hawkins RD, et al. Distinct  
576 and predictive chromatin signatures of transcriptional promoters and enhancers in  
577 the human genome. *Nat. Genet.* 2007;39:311–8.
- 578 11. Padeken J, Zeller P, Gasser SM. Repeat DNA in genome organization and  
579 stability. *Curr. Opin. Genet. Dev.*; 2015;31:12–9.
- 580 12. Nair N, Shoib M, Sørensen CS. Chromatin dynamics in genome stability: Roles  
581 in suppressing endogenous DNA damage and facilitating DNA repair. *Int. J. Mol. Sci.*  
582 2017;18:1–21.
- 583 13. Shaver S, Casas-Mollano JA, Cerny RL, Cerutti H. Origin of the polycomb



- 584 repressive complex 2 and gene silencing by an E(z) homolog in the unicellular alga  
585 *Chlamydomonas*. *Epigenetics*. 2010;5:301–12.
- 586 14. Szilard RK, Jacques P-E, Laramée L, Cheng B, Galicia S, Bataille AR, et al.  
587 Systematic identification of fragile sites via genome-wide location analysis of  
588 gamma-H2AX. *Nat. Struct. Mol. Biol.* 2010;17:299–305.
- 589 15. Kitada T, Schleker T, Sperling AS, Xie W, Gasser SM, Grunstein M.  $\gamma$ H2A is a  
590 component of yeast heterochromatin required for telomere elongation. *Cell Cycle*.  
591 2011;10:293–300.
- 592 16. Rozenzhak S, Mejía-Ramírez E, Williams JS, Schaffer L, Hammond J a, Head  
593 SR, et al. Rad3 decorates critical chromosomal domains with gammaH2A to protect  
594 genome integrity during S-Phase in fission yeast. *PLoS Genet.* 2010 ;6:e1001032.
- 595 17. Sasaki T, Lynch KL, Mueller C V., Friedman S, Freitag M. et al Heterochromatin  
596 controls  $\gamma$ H2A localization in *Neurospora crassa*. *Eukaryot. Cell.* 2014;13:990–1000.
- 597 18. Meier A, Fiegler H, Muñoz P, Ellis P, Rigler D, Langford C, et al. Spreading of  
598 mammalian DNA-damage response factors studied by ChIP-chip at damaged  
599 telomeres. *EMBO J.*; 2007;26:2707–18.
- 600 19. Iacovoni JS, Caron P, Lassadi I, Nicolas E, Massip L, Trouche D, et al. High-  
601 resolution profiling of gammaH2AX around DNA double strand breaks in the  
602 mammalian genome. *EMBO J.*; 2010;29:1446–57.
- 603 20. Clouaire T, Rocher V, Lashgari A, Arnould C, Aguirrebengoa M, Biernacka A, et  
604 al. Comprehensive Mapping of Histone Modifications at DNA Double-Strand Breaks  
605 Deciphers Repair Pathway Chromatin Signatures. *Mol. Cell* . 2018;1–13.
- 606 21. Wang J, Jia ST, Jia S. New Insights into the Regulation of Heterochromatin.  
607 *Trends Genet.* 2016;32:284–94.
- 608 22. De Las Peñas A, Juárez-Cepeda J, López-Fuentes E, Briones-Martín-del-Campo

- 609 M, Gutiérrez-Escobedo G, Castaño I. Local and regional chromatin silencing in  
610 *Candida glabrata*: consequences for adhesion and the response to stress FEMS  
611 Yeast Res. 2015;15:fov056.
- 612 23. Brown GD, Denning DW, Gow NAR, Levitz SM, Netea MG, White TC. Hidden  
613 Killers: Human Fungal Infections. Sci. Transl. Med. 2012;4:165rv13-165rv13.
- 614 24. Selmecki A, Forche A, Berman J. Genomic plasticity of the human fungal  
615 pathogen *Candida albicans*. Eukaryot. Cell. 2010;9:991–1008.
- 616 25. Muzzey D, Schwartz K, Weissman JS, Sherlock G. Assembly of a phased diploid  
617 *Candida albicans* genome facilitates allele-specific measurements and provides a  
618 simple model for repeat and indel structure. Genome Biol. 2013;14:R97.
- 619 26. Bruno VM, Wang Z, Marjani SL, Euskirchen GM, Martin J, Sherlock G, et al.  
620 Comprehensive annotation of the transcriptome of the human fungal pathogen  
621 *Candida albicans* using RNA-seq. Genome Res. 2010;20:1451–8.
- 622 27. Sellam A, Hogues H, Askew C, Tebbji F, van Het Hoog M, Lavoie H, et al.  
623 Experimental annotation of the human pathogen *Candida albicans* coding and  
624 noncoding transcribed regions using high-resolution tiling arrays. Genome Biol.  
625 2010;11:R71.
- 626 28. Tuch BB, Mitrovich QM, Homann OR, Hernday AD, Monighetti CK, De La Vega  
627 FM, et al. The transcriptomes of two heritable cell types illuminate the circuit  
628 governing their differentiation. Copenhaver GP, editor. PLoS Genet.  
629 2010;6:e1001070.
- 630 29. van het Hoog M, Rast TJ, Martchenko M, Grindle S, Dignard D, Hogues H, et al.  
631 Assembly of the *Candida albicans* genome into sixteen supercontigs aligned on the  
632 eight chromosomes. Genome Biol. 2007;8:R52.
- 633 30. McEachern MJ, Hicks JB. Unusually large telomeric repeats in the yeast *Candida*

- 634 albicans. *Mol. Cell. Biol.* 1993;13:551–60. A
- 635 31. Jones T, Federspiel NA, Chibana H, Dungan J, Kalman S, Magee BB, et al. The  
636 diploid genome sequence of *Candida albicans*. *Proc. Natl. Acad. Sci. U. S. A.*  
637 2004;101:7329–34.
- 638 32. Chibana H, Magee PT. The enigma of the major repeat sequence of *Candida*  
639 albicans. *Future Microbiol.* 2009;4:171–9.
- 640 33. Uhl MA, Biery M, Craig N, Johnson AD. Haploinsufficiency-based large-scale  
641 forward genetic analysis of filamentous growth in the diploid human fungal pathogen  
642 *C. albicans*. *EMBO J.* 2003;22:2668–78.
- 643 34. Goodwin TJD. Multiple LTR-Retrotransposon Families in the Asexual Yeast  
644 *Candida albicans*. *Genome Res.* 2000 ;10:174–91.
- 645 35. Zhang L, Yan L, Jiang J, Wang Y, Jiang Y, Yan T, et al. The structure and  
646 retrotransposition mechanism of LTR-retrotransposons in the asexual yeast *Candida*  
647 albicans. *Virulence.* 2014;5:1–10.
- 648 36. Goodwin TJD, Ormandy JE, Poulter RTM. L1-like non-LTR retrotransposons in  
649 the yeast *Candida albicans*. *Curr. Genet.* 2001;39:83–91.
- 650 37. Hirakawa MP, Martinez DA, Sakthikumar S, Anderson MZ, Berlin A, Gujja S, et  
651 al. Genetic and phenotypic intra-species variation in *Candida albicans*. *Genome Res.*  
652 2015;25:413–25.
- 653 38. Ene I V., Farrer RA, Hirakawa MP, Agwamba K, Cuomo CA, Bennett RJ. Global  
654 analysis of mutations driving microevolution of a heterozygous diploid fungal  
655 pathogen. *Proc. Natl. Acad. Sci.* 2018;115:201806002.
- 656 39. Freire-Benítez V, Price RJ, Buscaino A. The Chromatin of *Candida albicans*  
657 Pericentromeres Bears Features of Both Euchromatin and Heterochromatin. *Front.*  
658 *Microbiol.* 2016;7:759.

- 659 40. Peterson M, Price RJ, Gourlay S, May A, Tullet J, Buscaino A. The fungal-  
660 specific Hda2 and Hda3 proteins regulate morphological switches in the human  
661 fungal pathogen *Candida albicans*. *bioRxiv*. Cold Spring Harbor Laboratory;  
662 2018;340364.
- 663 41. Anderson MZ, Bennett RJ. Budding off: Bringing functional genomics to *Candida*  
664 *albicans*. *Brief. Funct. Genomics*. 2016;15:85–94.
- 665 42. Kim J, Lee J-E, Lee J-S. Histone deacetylase-mediated morphological transition  
666 in *Candida albicans*. *J. Microbiol*. 2015;53:805–11.
- 667 43. Thakur J, Sanyal K. Efficient neocentromere formation is suppressed by gene  
668 conversion to maintain centromere function. *Genome Research*. 2013;638–52.
- 669 44. Shroff R, Arbel-Eden A, Pilch D, Ira G, Bonner WM, Petrini JH, et al. Distribution  
670 and Dynamics of Chromatin Modification Induced by a Defined DNA Double-Strand  
671 Break. *Curr. Biol*; 2004;14:1703–11.
- 672 45. Ellahi A, Thurtle DM, Rine J. The Chromatin and Transcriptional Landscape of  
673 Native *Saccharomyces cerevisiae* Telomeres and Subtelomeric Domains. *Genetics*.  
674 2015;200:505–21.
- 675 46. Freire-Benítez V, Price RJ, Tarrant D, Berman J, Buscaino A. *Candida albicans*  
676 repetitive elements display epigenetic diversity and plasticity. *Sci. Rep*.  
677 2016;6:22989.
- 678 47. Hu B, Petela N, Kurze A, Chan KL, Chapard C, Nasmyth K. Biological  
679 chromodynamics: A general method for measuring protein occupancy across the  
680 genome by calibrating ChIP-seq. *Nucleic Acids Res*. 2015;43.
- 681 48. Orlando DA, Chen MW, Brown VE, Solanki S, Choi YJ, Olson ER, et al.  
682 Quantitative ChIP-Seq normalization reveals global modulation of the epigenome.  
683 *Cell Rep*; 2014;9:1163–70.

- 684 49. Helman E, Lawrence MS, Stewart C, Sougnez C, Getz G, Meyerson M, et al.  
685 Quantifying ChIP-seq data: a spiking method providing an internal reference for A  
686 cloud-compatible bioinformatics pipeline for ultrarapid pathogen identification.  
687 *Genome Res.* 2014;24:1157–68.
- 688 50. Schwartz K, Sherlock G. High-Throughput Yeast Strain Sequencing. *Cold Spring*  
689 *Harb. Protoc.* 2016:pdb.top077651.
- 690 51. Krogan NJ, Dover J, Khorrami S, Greenblatt JF, Schneider J, Johnston M, et al.  
691 COMPASS, a histone H3 (Lysine 4) methyltransferase required for telomeric  
692 silencing of gene expression. *J. Biol. Chem.* 2002;277:10753–5.
- 693 52. Bryk M, Briggs SD, Strahl BD, Curcio MJ, Allis CD, Winston F. Evidence that  
694 Set1, a factor required for methylation of histone H3, regulates rDNA silencing in *S.*  
695 *cerevisiae* by a Sir2-independent mechanism. *Curr. Biol.* 2002;12:165–70.
- 696 53. Margaritis T, Oreal V, Brabers N, Maestroni L, Vitaliano-Prunier A, Benschop JJ,  
697 et al. Two Distinct Repressive Mechanisms for Histone 3 Lysine 4 Methylation  
698 through Promoting 3'-End Antisense Transcription. *PLoS Genet.* 2012;8.
- 699 54. Ramakrishnan S, Pokhrel S, Palani S, Pflueger C, Parnell TJ, Cairns BR, et al.  
700 Counteracting H3K4 methylation modulators Set1 and Jhd2 co-regulate chromatin  
701 dynamics and gene transcription. *Nat. Commun.* 2016;7:11949.
- 702 55. Weiner A, Hsieh THS, Appleboim A, Chen H V., Rahat A, Amit I, et al. High-  
703 resolution chromatin dynamics during a yeast stress response. *Mol. Cell.*  
704 2015;58:371–86.
- 705 56. Lorenz DR, Meyer LF, Grady PJR, Meyer MM, Cam HP. Heterochromatin  
706 assembly and transcriptome repression by Set1 in coordination with a class II  
707 histone deacetylase. *Elife.* 2014;3:1–17.
- 708 57. Raman SB, Nguyen MH, Zhang Z, Cheng S, Jia HY, Weisner N, et al. *Candida*

- 709 albicans SET1 encodes a histone 3 lysine 4 methyltransferase that contributes to the  
710 pathogenesis of invasive candidiasis. *Mol. Microbiol.* 2006;60:697–709.
- 711 58. Mellone BG, Ball L, Suka N, Grunstein MR, Partridge JF, Allshire RC.  
712 Centromere Silencing and Function in Fission Yeast Is Governed by the Amino  
713 Terminus of Histone H3. *Curr. Biol. Cell Press*; 2003;13:1748–57.
- 714 59. Hirakawa MP, Martinez D a, Sakthikumar S, Anderson MZ, Berlin A, Gujja S, et  
715 al. Genetic and phenotypic intra-species variation in *Candida albicans*. 2015;1–13.
- 716 60. Forche A, Abbey D, Pisithkul T, Weinzierl MA, Ringstrom T, Bruck D, et al.  
717 Stress alters rates and types of loss of heterozygosity in *Candida albicans*. *MBio*.  
718 2011;2.
- 719 61. Freire-Benítez V, Gourlay S, Berman J, Buscaino A. Sir2 regulates stability of  
720 repetitive domains differentially in the human fungal pathogen *Candida albicans*.  
721 *Nucleic Acids Res.* 2016;44.
- 722 62. Santos-Pereira JM, Aguilera A. R loops: new modulators of genome dynamics  
723 and function. *Nat. Rev. Genet.* 2015;16:583–97.
- 724 63. Langmead B, Salzberg SL. Fast gapped-read alignment with Bowtie 2. *Nat.*  
725 *Methods [Internet]*. 2012;9:357–9.
- 726 64. Feng J, Liu T, Qin B, Zhang Y, Liu XS. Identifying ChIP-seq enrichment using  
727 MACS. *Nat. Protoc.* 2012;7:1728–40.
- 728 65. Liao Y, Smyth GK, Shi W. featureCounts: an efficient general purpose program  
729 for assigning sequence reads to genomic features. *Bioinformatics.* 2014;30:923–30.
- 730 66. Ramírez F, Ryan DP, Grüning B, Bhardwaj V, Kilpert F, Richter AS, et al.  
731 deepTools2: a next generation web server for deep-sequencing data analysis.  
732 *Nucleic Acids Res.* 2016;44:W160-5.
- 733 67. Thorvaldsdóttir H, Robinson JT, Mesirov JP. Integrative Genomics Viewer (IGV):

734 high-performance genomics data visualization and exploration. *Brief. Bioinform.*

735 2013;14:178–92.

736 68. Kim D, Langmead B, Salzberg SL. HISAT: a fast spliced aligner with low memory

737 requirements. *Nat. Methods.* 2015;12:357–60.

### 738 **ADDITIONAL FILES**

739 Additional file 1- 10: Fig S1 to S10. pdf

740 Additional file 11: Table S1: Strains used in this study

741 Additional file 12: Table S2.xls ; Sequencing and coverage information

742 Additional file 13: Dataset S1.xls ; Datasets generated in this study

### 743 **FIGURE LEGENDS**

744 **Figure 1** Histones and RNA Polymerase II occupancy **(A)** Correlation between H3

745 and H4 occupancy (log<sub>10</sub> counts at 1 kb bins) across the *C. albicans* genome. **(B)**

746 Correlation between RNAPII occupancy (log<sub>10</sub> counts) and transcriptional levels

747 (RNA-seq; log<sub>10</sub> counts) at protein-coding genes. **(C)** Histone H3 is depleted at

748 centromeric regions. Fold enrichment (log<sub>2</sub>) of histone H3 relative to unmodified H4

749 across CEN1 (Chr1) and CEN5 (Chr5) centromeric and pericentromeric regions in *C.*

750 *albicans*. The Cse4<sup>CENP-A</sup> enrichment profile [43] is shown as comparison. The blue

751 bar indicates statistically significant depleted regions for histone H3.

752 **Figure 2** *C. albicans* chromatin modifications mirror their transcriptional state **(A)**

753 Chromatin signature of *C. albicans* genes (n=6408). Average profiles and heatmaps

754 of histone modification signatures around the Transcriptional Start Sites (TSS) of

755 genes. The relative fold enrichment (log<sub>2</sub>) for each histone modification normalised

756 to unmodified histone H4, or aligned reads of immunoprecipitated (IP) sample

757 normalised to aligned reads of Input sample (for RNAPII ChIP-seq) is displayed

758 within a region spanning ±0.5 kb around TSS. The gradient blue-to-red colour

759 indicates high-to-low enrichment in the corresponding region. Min: - 1.5 log<sub>2</sub>. Max: +  
760 1.5 log<sub>2</sub>. **(B)** Average profiles of histone modifications and RNAPII occupancy across  
761 gene sets of different expression level (no [n = 416], low [n = 1369], medium [n =  
762 3570] and high [n = 983] expression). For each histone modification, the fold  
763 enrichment (log<sub>2</sub>) relative to unmodified H4 is shown. For RNAPII the IP/I  
764 enrichment (log<sub>2</sub>) is shown.

765 **Figure 3** Identification of *C. albicans*  $\gamma$ -sites **(A)** Locations and frequencies of  $\gamma$ -sites  
766 throughout the *C. albicans* genome. **(B)**  $\gamma$ -sites map to longer genes. Histogram  
767 showing the gene lengths of  $\gamma$ -sites (red) compared to the genome average (grey)  
768 **(C)** Chromatin signature of  $\gamma$ -sites throughout the *C. albicans* genome. Average  
769 profiles and heatmaps of histone modification signatures at  $\gamma$ -sites. The relative fold  
770 enrichment (log<sub>2</sub>) for each histone modification normalised to unmodified histone H4  
771 is displayed within a region spanning  $\pm 2$  kb around the  $\gamma$ H2A peak summits. The  
772 gradient blue-to-red colour indicates high-to-low enrichment in the corresponding  
773 region. Min: - 1.5 log<sub>2</sub>. Max: + 1.5 log<sub>2</sub>.

774 **Figure 4** Chromatin signature of *C. albicans* repetitive elements **(A)** *Top*: Fold  
775 enrichment (log<sub>2</sub>) of H3K4me<sup>3</sup>, H3K9Ac, H4K16Ac,  $\gamma$ H2A and H3 relative to  
776 unmodified H4 across the 20 kb right terminal region of chromosome 6 (Chr6).  
777 *Middle*: Diagram of coding genes found at these regions, according to assembly 22.  
778 *Bottom*: Diagram depicting statistically significant enriched (red) or depleted (blue)  
779 domains for each histone modification. **(B)** *Top*: Fold enrichment (log<sub>2</sub>) of H3K4me<sub>3</sub>,  
780 H3K9Ac, H4K16Ac,  $\gamma$ H2A and H3 relative to unmodified H4 at the rDNA locus and  
781 flanking regions (ChrR). *Middle*: Diagram of coding genes (white) and ncRNA (grey)  
782 found at this region, according to assembly 22. *Bottom*: Diagram depicting  
783 statistically significant enriched (red) or depleted (blue) domains for each histone



784 modification **(C)** Average profiles of histone modifications at MRS repeats, and  
785 upstream and downstream sequences. The grey arrow indicates the location of the  
786 FGR gene. For each histone modification, the fold enrichment ( $\log_2$ ) relative to  
787 unmodified H4 is shown. **(D) Left:** Diagrams of the structure of the *C. albicans* LTR  
788 and non-LTR retrotransposons. *Right:* Chromatin signature of LTR and non-LTR  
789 retrotransposons. Average profiles and heatmaps of histone modification signatures  
790 across each sequence. The relative fold enrichment ( $\log_2$ ) for each histone  
791 modification normalised to unmodified histone H4, or aligned reads of  
792 immunoprecipitated (IP) sample normalised to aligned reads of Input sample (for  
793 RNAPII ChIP-seq) is displayed. The gradient blue-to-red colour indicates high-to-low  
794 enrichment in the corresponding region. Min: - 1.5  $\log_2$ . Max: + 1.5  $\log_2$ .

795 **Figure 5** The HDAC Sir2 controls the chromatin state of subtelomeres and the rDNA  
796 locus **(A)** Schematic of the quantitative ChIP-seq experimental and analytical  
797 workflow. **(B) Top:** Fold enrichment ( $\log_2$ ) of H3K9Ac and H4K16Ac relative to  
798 unmodified H4 in WT cells, and relative to WT in *sir2 $\Delta$  $\Delta$*  cells, across the rDNA loci  
799 of chromosome R (ChrR). *Middle:* Diagram of transcripts found at this region,  
800 according to assembly 22. *Bottom:* Heatmap depicting changes in gene and ncRNA  
801 expression across the rDNA region in *sir2 $\Delta$  $\Delta$*  cells relative to WT. The gradient  
802 yellow-to-blue colour indicates high-to-low expression. Min: - 2  $\log_2$ . Max: + 2  $\log_2$ .  
803 **(C) Left:** Fold enrichment ( $\log_2$ ) of H3K9Ac and H4K16Ac relative to unmodified H4  
804 in WT cells, and relative to WT in *sir2 $\Delta$  $\Delta$*  cells, across the 20 kb left and right  
805 terminal regions of chromosome 3 (Chr3). Diagrams of coding genes (TLO: grey)  
806 found at these regions, according to assembly 22, are below. *Right:* Heatmap  
807 depicting changes in gene and ncRNA expression in *sir2 $\Delta$  $\Delta$*  cells relative to WT at

808 the 10 kb terminal regions of all *C. albicans* chromosomes. The gradient yellow-to-  
809 blue colour indicates high-to-low expression. Min: - 2 log<sub>2</sub>. Max: + 2 log<sub>2</sub>.

810 **Figure 6** Chromatin and gene expression changes of *set1Δ/Δ* strain **(A)** Heatmap  
811 depicting changes in expression of genes and ncRNA associated with statistically  
812 significant changes in H3K4me<sup>3</sup> enrichment in *set1Δ/Δ* cells relative to WT cells. The  
813 gradient yellow-to-blue colour indicates high-to-low enrichment/expression. Min: - 4  
814 log<sub>2</sub>. Max: + 4 log<sub>2</sub> **(B)** *Top*: Fold enrichment (log<sub>2</sub>) of H3K4me<sup>3</sup> relative to  
815 unmodified H4 in WT cells, and relative to WT in *set1Δ/Δ* cells, across the 20 kb left  
816 and right terminal regions of chromosome 3 (Chr3). Diagrams of coding genes (TLO:  
817 grey) found at these regions, according to assembly 22, are below. *Bottom*: Heatmap  
818 depicting changes in gene and ncRNA expression in *set1Δ/Δ* cells relative to WT at  
819 the 10 kb terminal regions of all *C. albicans* chromosomes. The gradient yellow-to-  
820 blue colour indicates high-to-low expression. Min: - 2 log<sub>2</sub>. Max: + 2 log<sub>2</sub>. **(C)** *Left*:  
821 Fold enrichment (log<sub>2</sub>) of H3K4me<sup>3</sup> relative to unmodified H4 in WT cells, and  
822 relative to WT in *set1Δ/Δ* cells, across the rDNA loci of chromosome R (ChrR).  
823 Diagrams of coding genes and ncRNA (grey) found at this region, according to  
824 assembly 22, are below. *Right*: Heatmap depicting changes in gene and ncRNA  
825 expression across the rDNA region in *set1Δ/Δ* cells relative to WT. The gradient  
826 yellow-to-blue colour indicates high-to-low expression. Min: - 2 log<sub>2</sub>. Max: + 2 log<sub>2</sub>.  
827 **(D)** *Left*: Profiles of fold enrichment (log<sub>2</sub>) of H3K4me<sup>3</sup> relative to unmodified H4 in  
828 WT cells, and relative to WT in *set1Δ/Δ* cells averaged across the MRS repeats, and  
829 the upstream and downstream sequences. The grey arrow indicates the location of  
830 the FGR gene. *Right*: Heatmap depicting changes in gene and ncRNA expression  
831 across all of the MRS regions in *set1Δ/Δ* cells relative to WT. The gradient yellow-to-  
832 blue colour indicates high-to-low expression. Min: - 2 log<sub>2</sub>. Max: + 2 log<sub>2</sub>.

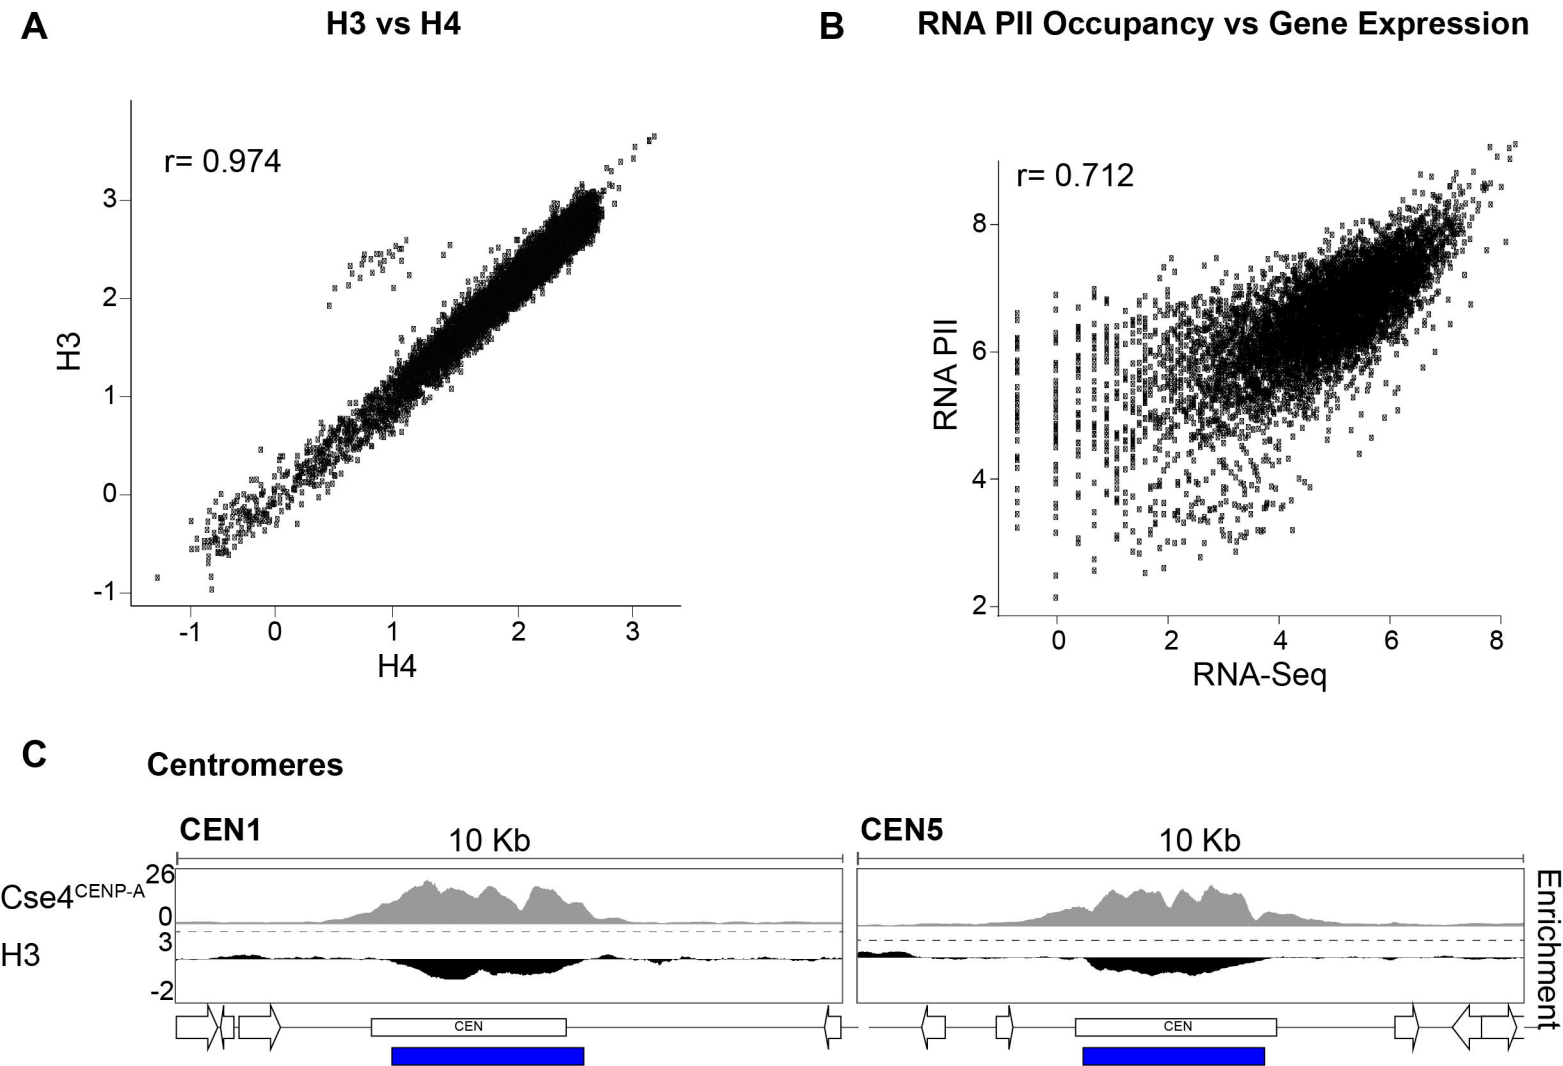

Fig 2

### A Chromatin signature of protein-coding genes

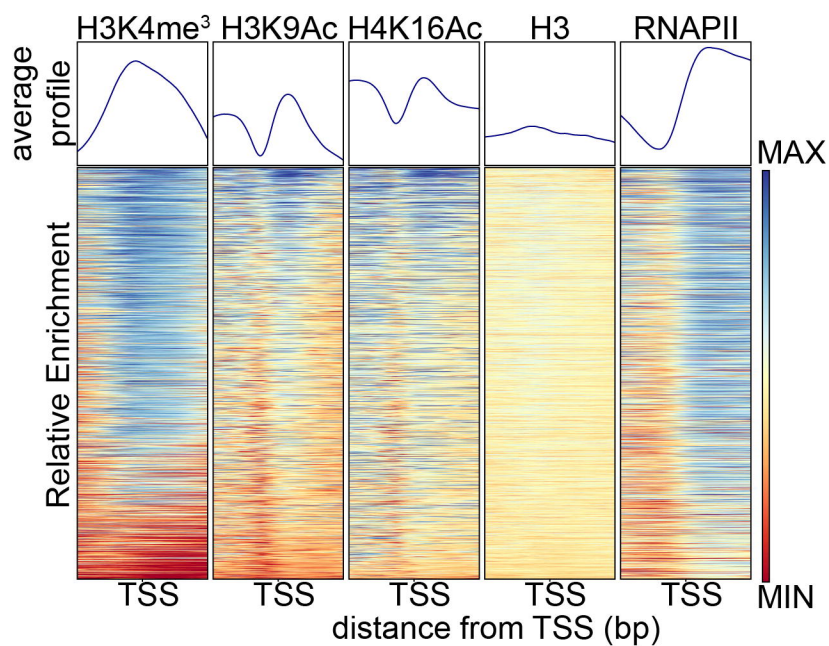

### B

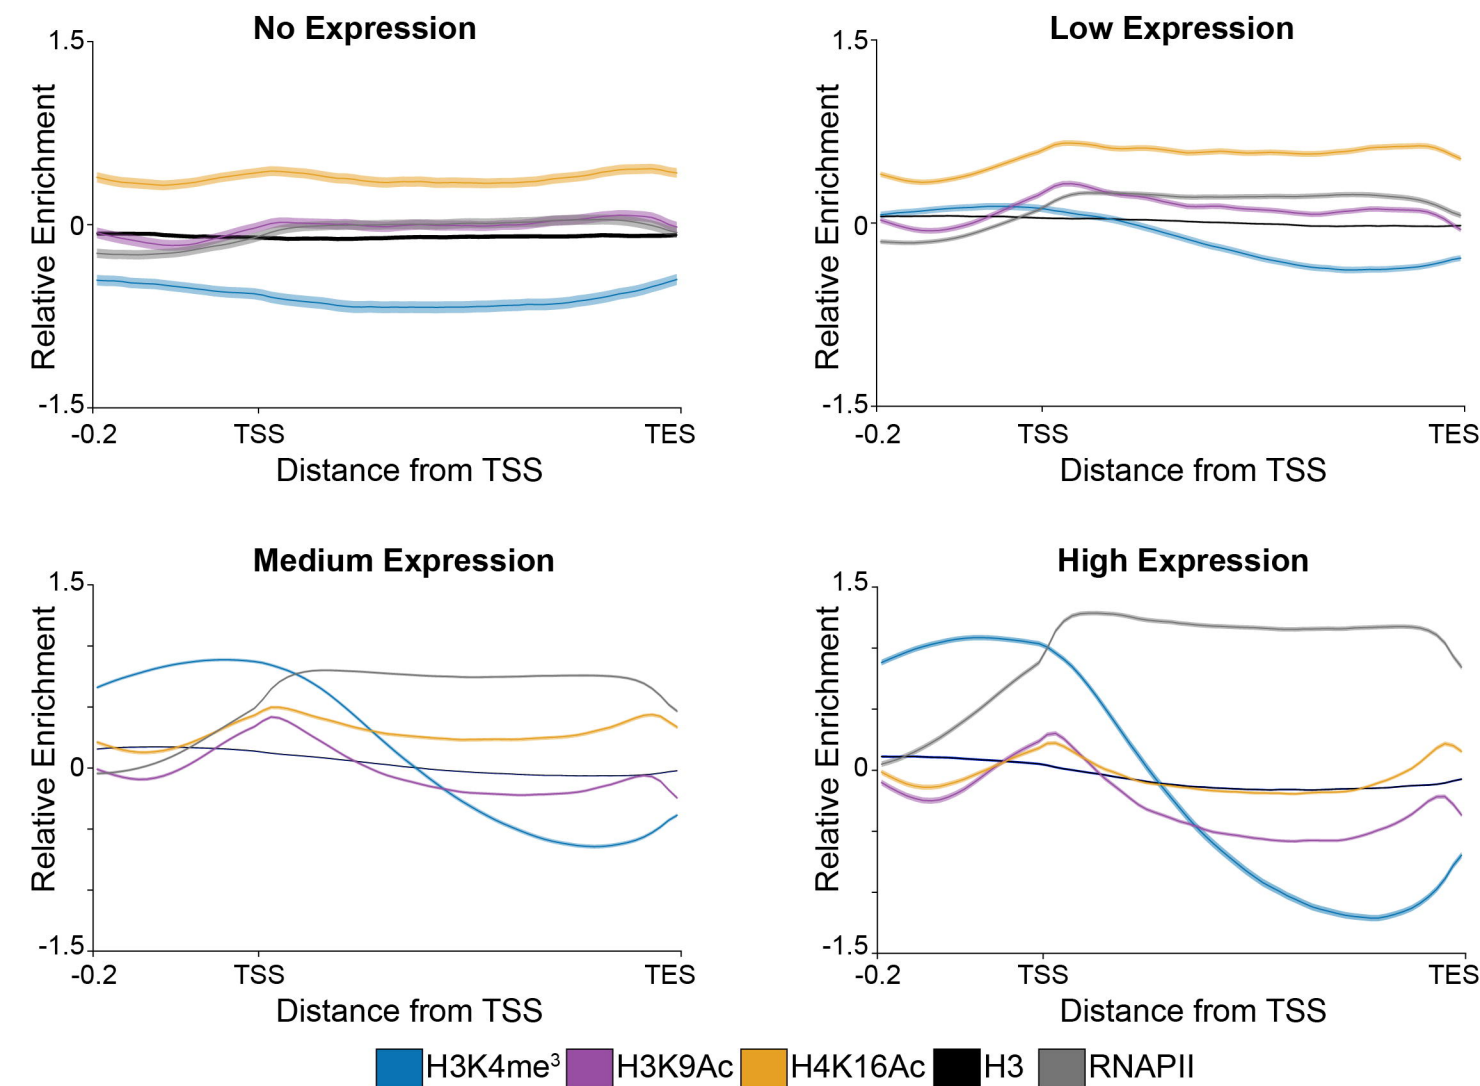

Fig 3

A

*C. albicans*  $\gamma$ -sites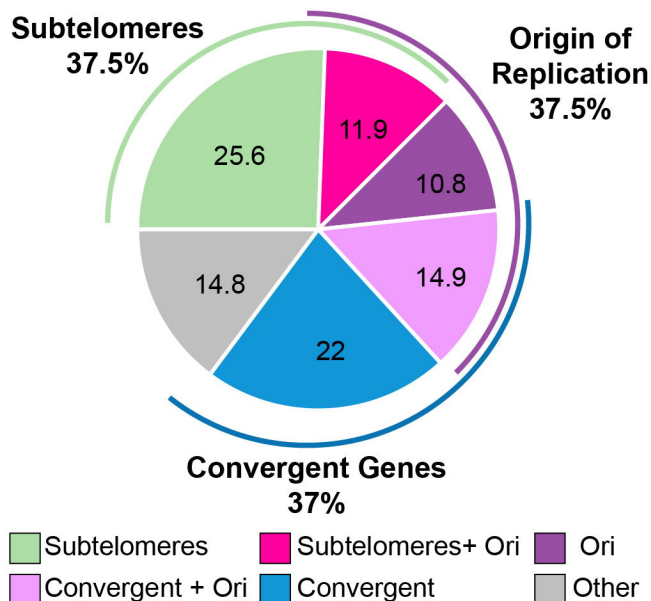

B

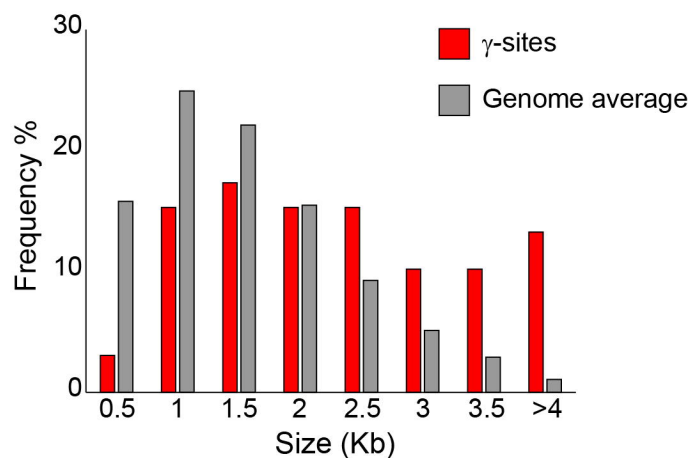

C

Chromatin signature of  $\gamma$ -sites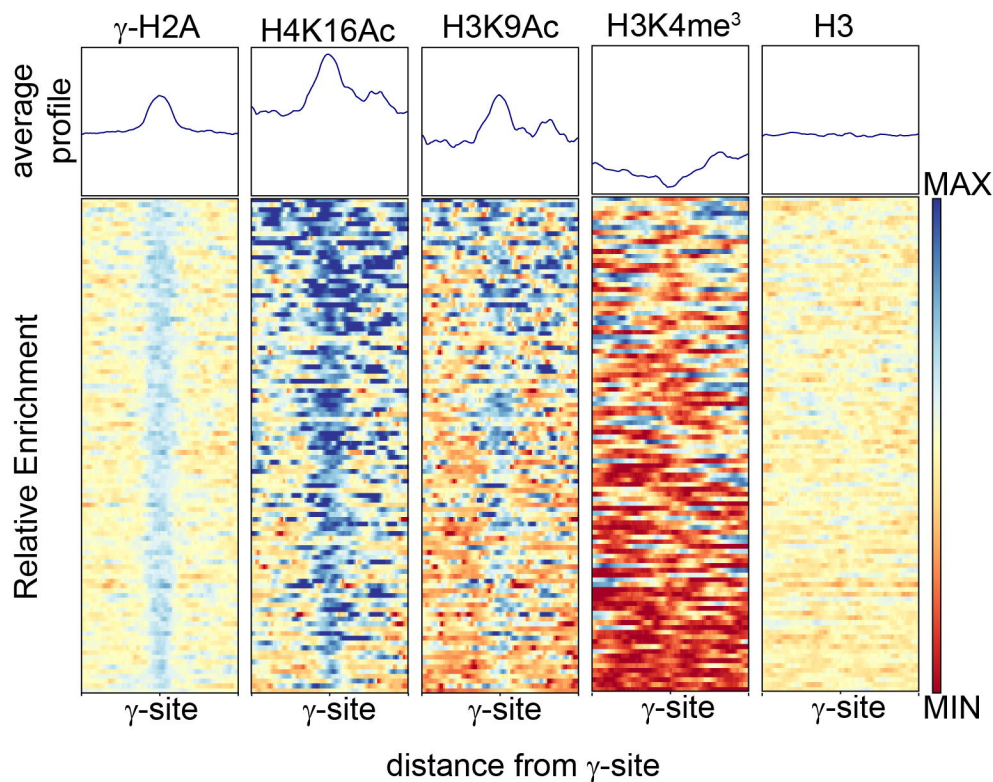

A  
Subtelomeric regions

bioRxiv preprint doi: <https://doi.org/10.1101/475996>; this version posted November 22, 2018. The copyright holder for this preprint (which was not certified by peer review) is the author/funder, who has granted bioRxiv a license to display the preprint in perpetuity. It is made available under aCC-BY 4.0 International license.

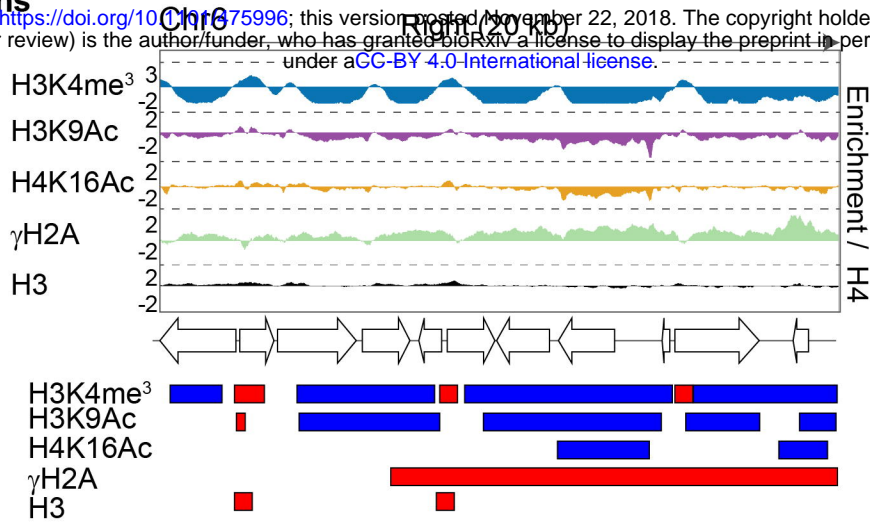B  
rDNA locus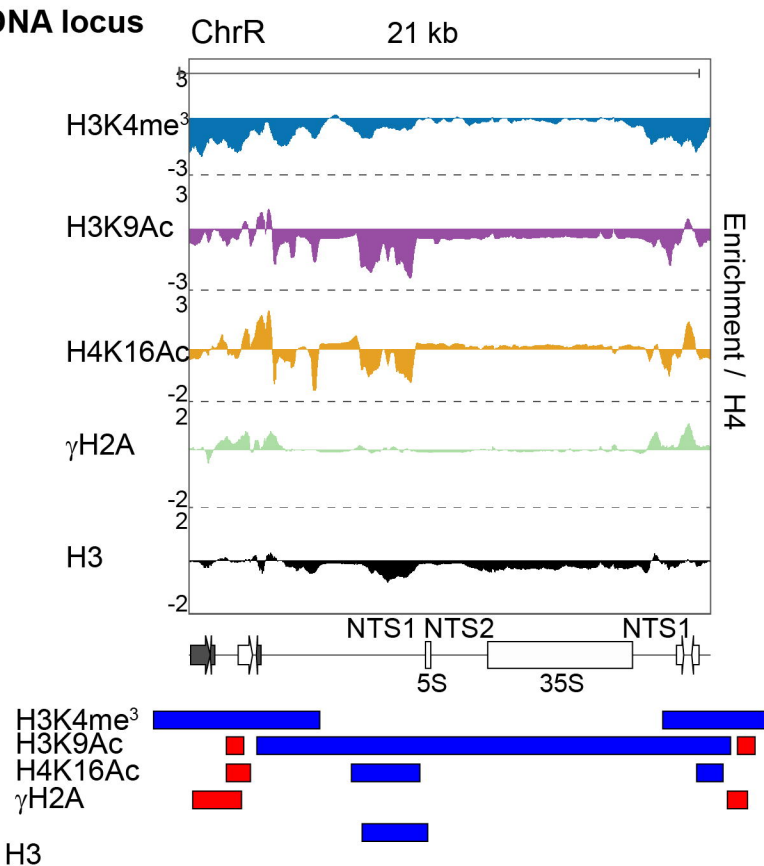C  
MRS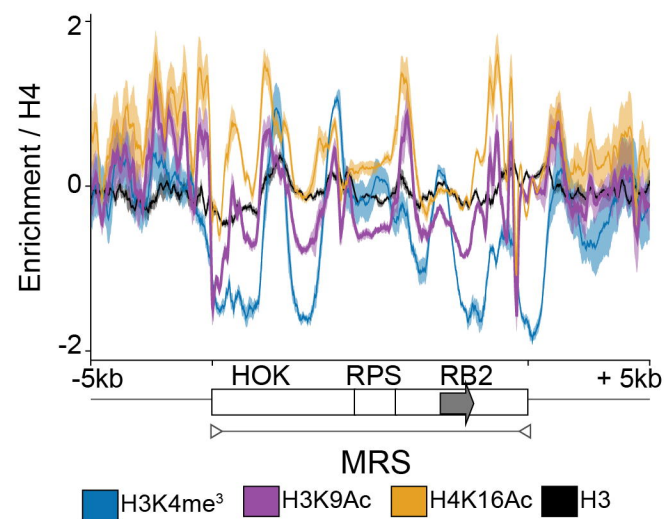

## D

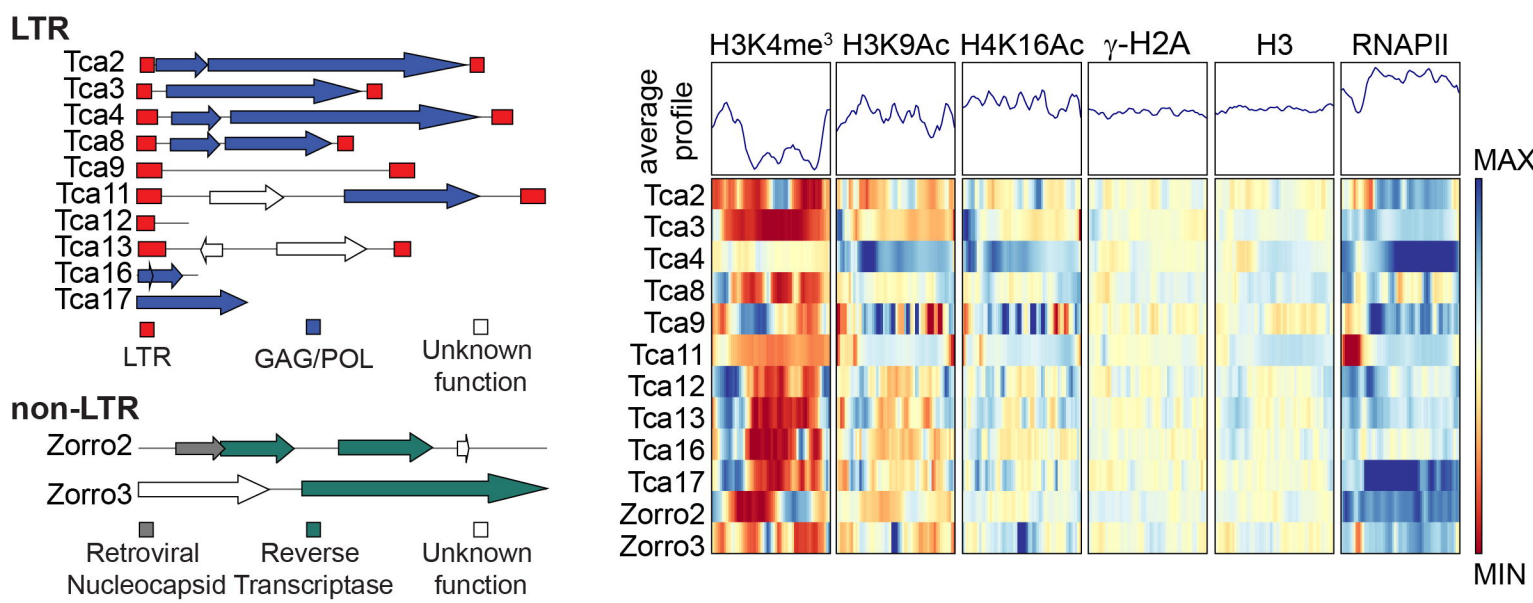

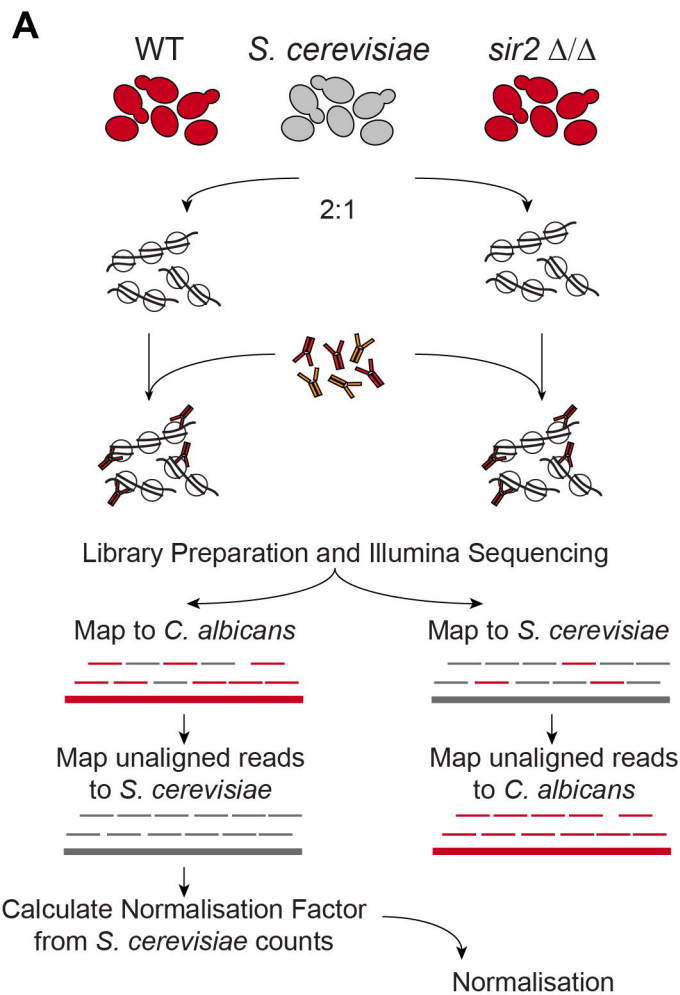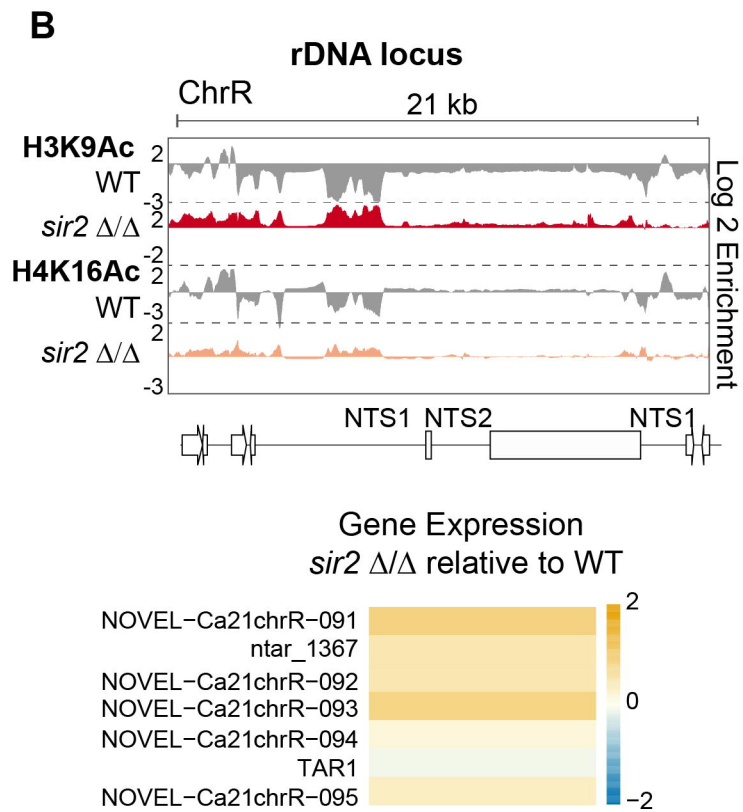

**C**      **Telomeric and Subtelomeric regions**

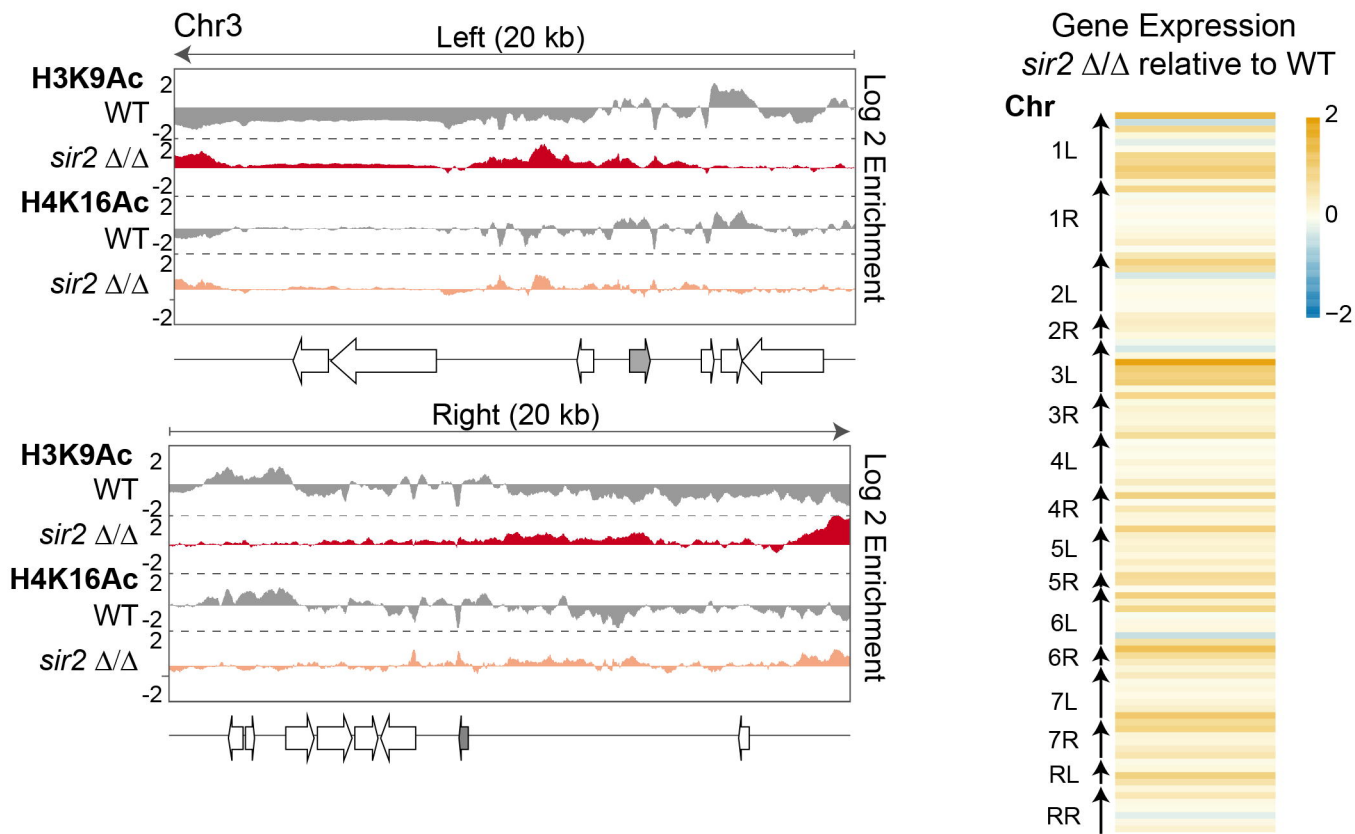

**A**

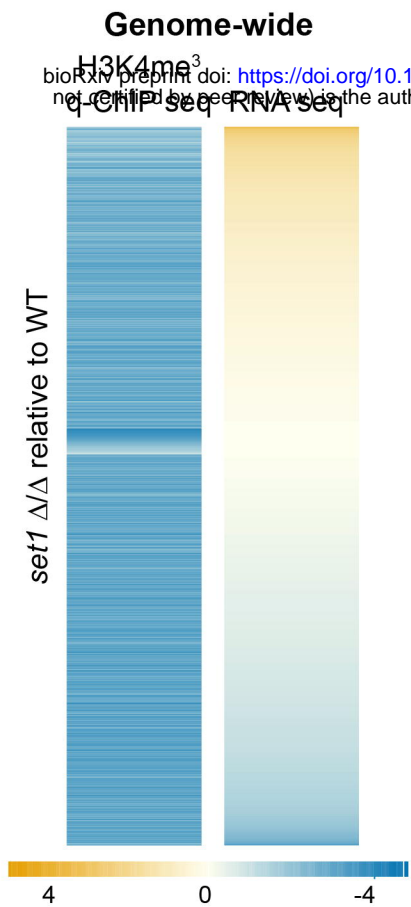

**B**

**Telomeric and Subtelomeric regions**

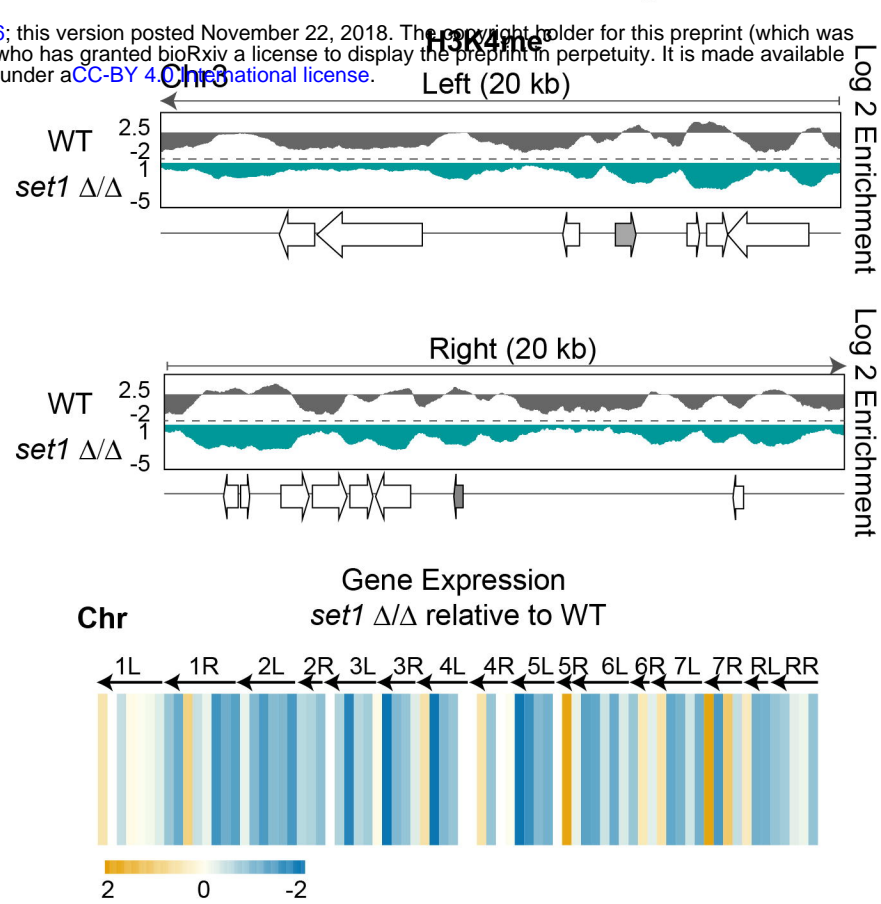

**C**

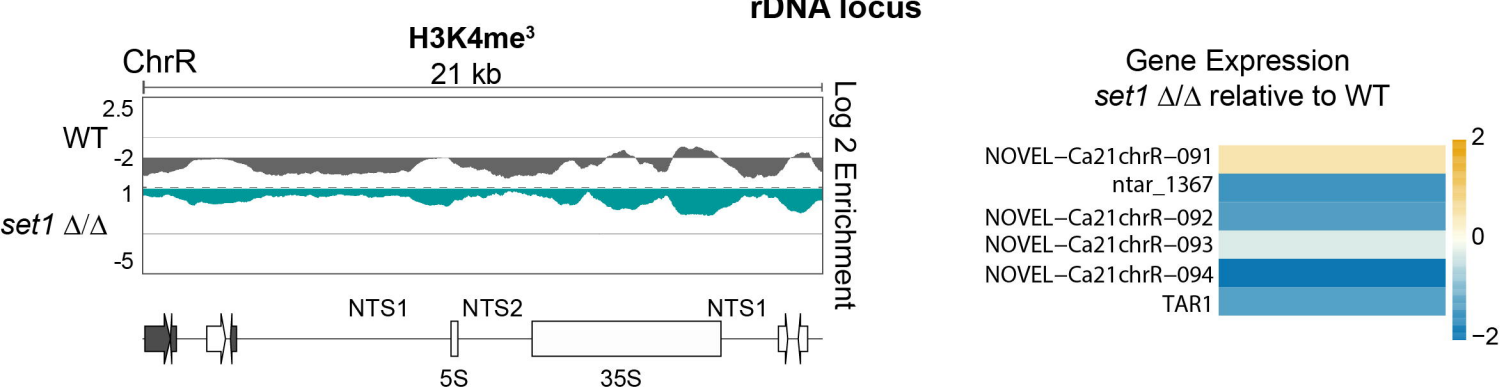

**D**

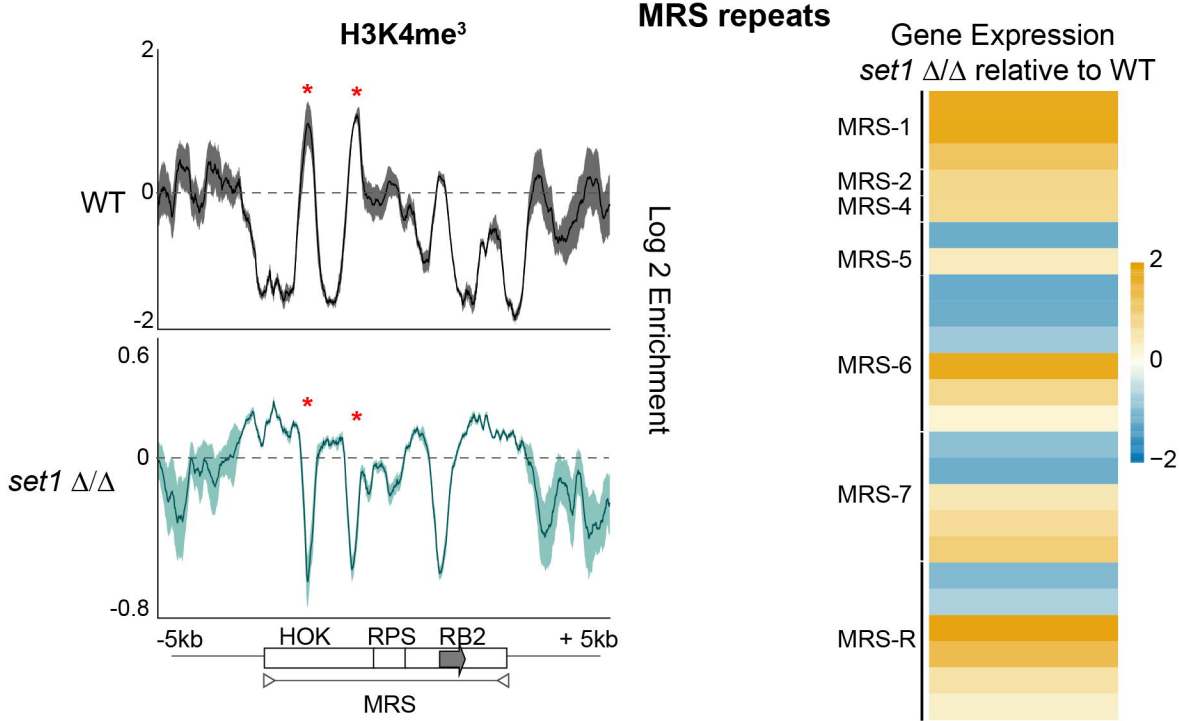

Source: http://biorxiv.org/content/10.1101/475996v1.full.pdf
